# Supplementary material for: Automated Protein Secondary Structure Assignment from Cα Positions Using Neural Networks
Source: MDPI journal article supplement (doi:10.3390/biom12060841), 2022-06-17
Supplement: s1 [file s1]

|       |       |       |       |       |       |       |       |
|-------|-------|-------|-------|-------|-------|-------|-------|
| 1a62A | 1dyqA | 1fp2A | 1h2cA | 1isuA | 1k20A | 1lo7A | 1n62A |
| 1a7sA | 1dysA | 1fr3A | 1h32A | 1it2A | 1k38A | 1lq9A | 1n62B |
| 1a8dA | 1dzkA | 1fsgC | 1h32B | 1itxA | 1k3iA | 1lqtA | 1n62C |
| 1abaA | 1e29A | 1ft5A | 1h4aX | 1iu8A | 1k3xA | 1lqvA | 1n7oA |
| 1ah7A | 1e2wA | 1fx2A | 1h4xA | 1iujA | 1k4iA | 1ls1A | 1n7sA |
| 1ahoA | 1e4mM | 1fyeA | 1h5qA | 1iuqA | 1k4nA | 1lu4A | 1n7sB |
| 1aoeA | 1e58A | 1g12A | 1h80A | 1ix9A | 1k5cA | 1lucA | 1n7sC |
| 1atgA | 1e5kA | 1g2qA | 1h97B | 1ixhA | 1k5nA | 1lucB | 1n7sD |
| 1b0bA | 1e6uA | 1g2rA | 1h99A | 1iy8A | 1k5nB | 1lv7A | 1n8vA |
| 1b0uA | 1e7lA | 1g2yA | 1hdhB | 1iybA | 1k7cA | 1lwbA | 1na3B |
| 1b5eA | 1e9gA | 1g3pA | 1hdoA | 1j0pA | 1k7jA | 1lzlA | 1nbuA |
| 1b67A | 1eajA | 1g4iA | 1hfeM | 1j2jB | 1k7kA | 1m15A | 1nc5A |
| 1b6gA | 1eaqA | 1g5aA | 1hfeT | 1j2rA | 1k8uA | 1m1fA | 1nc7A |
| 1b9oA | 1eazA | 1g61A | 1hlqA | 1j34A | 1ka1A | 1m1qA | 1nfpA |
| 1bgfA | 1eb6A | 1g66A | 1hnjA | 1j3aA | 1kafA | 1m22A | 1ng6A |
| 1bkrA | 1edmB | 1g6gA | 1hq1A | 1j3wA | 1kb0A | 1m2dA | 1nkdA |
| 1brtA | 1egwA | 1g6hA | 1hqsA | 1j77A | 1kdgA | 1m2xA | 1nkgA |
| 1bteA | 1ehdA | 1g6iA | 1ht6A | 1j8uA | 1kgdA | 1m40A | 1nkiA |
| 1bx7A | 1ej0A | 1g6xA | 1hw1A | 1j98A | 1kgsA | 1m4iA | 1nlqA |
| 1byiA | 1ej8A | 1g8aA | 1hxxA | 1jb3A | 1kjqA | 1m4jA | 1nn5A |
| 1c0pA | 1ekqA | 1ga6A | 1hxiA | 1jbeA | 1kkoA | 1m4lA | 1nnfA |
| 1c1dA | 1elkA | 1gciA | 1hyoA | 1jcdA | 1kmtA | 1m55A | 1nnlA |
| 1c1kA | 1eluA | 1gheA | 1hz4A | 1je0A | 1kmvA | 1m65A | 1nnxA |
| 1c4qD | 1elwA | 1gk7A | 1hztA | 1jekA | 1kngA | 1m70A | 1nogA |
| 1c52A | 1ep0A | 1gk9A | 1i0rA | 1jekB | 1knmA | 1m9zA | 1noxA |
| 1c5eA | 1es5A | 1gk9B | 1i0vA | 1jerA | 1koeA | 1mb3A | 1nqjA |
| 1c75A | 1es9A | 1gkmA | 1i12A | 1jetA | 1kq1A | 1mbaA | 1nthA |
| 1c7kA | 1et1A | 1gkpF | 1i1nA | 1jf3A | 1kq3A | 1mc2A | 1ntvA |
| 1cc8A | 1eu1A | 1gmua | 1i1wA | 1jf8A | 1kq6A | 1mf7A | 1nu0A |
| 1ccwC | 1euvA | 1gmxA | 1i24A | 1jfbA | 1kqfA | 1mg7A | 1nuyA |
| 1ccwD | 1euwA | 1gnlA | 1i27A | 1jfuA | 1kqfB | 1mj4A | 1nwwA |
| 1cg5A | 1evlA | 1goiA | 1i2tA | 1jg1A | 1kqfC | 1mj5A | 1nwzA |
| 1cg5B | 1ew0A | 1gp0A | 1i4uA | 1jhjA | 1kqpA | 1mjnA | 1nxcA |
| 1cruA | 1ew4A | 1gppA | 1i52A | 1ji7A | 1kr4A | 1mk0A | 1nxmA |
| 1cs1A | 1eyvA | 1gqiA | 1i58A | 1jigA | 1krhA | 1mkkA | 1nycA |
| 1cseI | 1ezgA | 1gqvA | 1i60A | 1jkeA | 1kt6A | 1mkzB | 1nykA |
| 1cxqA | 1f0lA | 1gs5A | 1i8oA | 1jkxA | 1kthA | 1mn8A | 1nz0A |
| 1cy5A | 1f1eA | 1gtvA | 1id0A | 1jl0A | 1kw3B | 1mnnA | 1nzjA |
| 1d2sA | 1f2tA | 1gu2B | 1idpA | 1jl1A | 1kwfA | 1moqA | 1o04A |
| 1d4oA | 1f2tB | 1gutA | 1ifcA | 1jm1A | 1kwgA | 1ms9A | 1o06A |
| 1d4tA | 1f46A | 1gv9A | 1ifrA | 1jndA | 1kyfA | 1mtpA | 1o1zA |
| 1d5tA | 1f74A | 1gvdA | 1ig5A | 1jniA | 1l3kA | 1mtpB | 1o2dA |
| 1d8wA | 1f7dB | 1gveB | 1ii5A | 1jnrA | 1l6rA | 1munA | 1o4yA |
| 1dbwA | 1f7lA | 1gvpA | 1ijqA | 1jnrB | 1l7aA | 1muwA | 1o6vA |
| 1dcia | 1f86A | 1gvzA | 1ikpA | 1jo0B | 1l7mA | 1mv8D | 1o7iA |
| 1dcsA | 1f94A | 1gweA | 1in4A | 1jovA | 1l9lA | 1mwqB | 1o7jA |
| 1dd9A | 1f9vA | 1gwmA | 1inlA | 1jr8A | 1l9xA | 1mxgA | 1o8xA |
| 1dfmA | 1fcqA | 1gxmA | 1io0A | 1jtvA | 1lamA | 1mxrA | 1o97C |
| 1dg6A | 1fcyA | 1gxuA | 1io7A | 1ju2A | 1lc0A | 1my7A | 1o97D |
| 1di6A | 1fg7A | 1gy7A | 1iomA | 1juhD | 1lc5A | 1n08A | 1o98A |
| 1dj0A | 1fgyA | 1gyoA | 1iooA | 1jx6A | 1lf7A | 1n13A | 1o9gA |
| 1dk8A | 1fiuA | 1gyxA | 1iq6A | 1jy2N | 1lkkA | 1n13B | 1o9iA |
| 1dlwA | 1fj2A | 1gz2A | 1iqqA | 1jy2O | 1llfA | 1n3lA | 1oaaA |
| 1dp7P | 1fm0D | 1h12A | 1iqzA | 1jy2P | 1llmC | 1n40A | 1oaiA |
| 1ds1A | 1fm0E | 1h16A | 1irqA | 1jyKc | 1lmiA | 1n45A | 1oc7A |
| 1dypA | 1fo8A | 1h1nB | 1is3A | 1jz8C | 1lniA | 1n57A | 1ocyA |

|       |       |       |       |       |       |       |       |
|-------|-------|-------|-------|-------|-------|-------|-------|
| 1od3A | 1q4uA | 1rk6A | 1t6cA | 1upqA | 1vl7A | 1wpuA | 1xvxA |
| 1odmA | 1q5yA | 1rkiA | 1t6fA | 1ur1A | 1vlyA | 1wqjB | 1xyzA |
| 1odzB | 1q6oB | 1rkqA | 1t6uA | 1ursA | 1vmgA | 1wr8A | 1y07A |
| 1oewA | 1q6zA | 1rkuA | 1t8kA | 1us0A | 1vmhA | 1ws8A | 1y0hA |
| 1of8B | 1q7eA | 1rl0A | 1t92A | 1us5A | 1vmjA | 1wt6A | 1y0pA |
| 1ofwA | 1q7lA | 1rm6A | 1t9hA | 1uscA | 1vp8A | 1wtjA | 1y0uA |
| 1oh4A | 1q7lB | 1rm6B | 1t9iA | 1useA | 1vqsA | 1wu4A | 1y0yA |
| 1ohlA | 1qauA | 1rocA | 1tbfA | 1usmA | 1vr7A | 1wu9A | 1y1pA |
| 1ohpA | 1qddA | 1rp0A | 1tc1A | 1utgA | 1vrmA | 1wvfA | 1y2kA |
| 1oi0A | 1qe3A | 1rtqA | 1tg0A | 1utiA | 1vyiA | 1wvhA | 1y2mA |
| 1oi6A | 1qftA | 1rttA | 1tgxA | 1uuqA | 1vykA | 1wvqA | 1y43A |
| 1oi7A | 1qg8A | 1ru4A | 1thxA | 1uuyA | 1vyrA | 1wwiA | 1y43B |
| 1ok0A | 1qgvA | 1rutX | 1tjoA | 1uwcB | 1vziA | 1wy3A | 1y4wA |
| 1okiA | 1qh5A | 1rv9A | 1tjxA | 1uwkA | 1vzmA | 1wzaA | 1y55X |
| 1olrA | 1qhqa | 1rw1A | 1tkeA | 1uz3A | 1w0hA | 1wzdA | 1y5hA |
| 1oohA | 1qksA | 1rwhA | 1tkjA | 1uzkA | 1w0nA | 1x0tA | 1y6xA |
| 1oqjA | 1qlwA | 1ry6A | 1tp6A | 1v05A | 1w0pA | 1x1kF | 1y8aA |
| 1oqvA | 1qnrA | 1rylA | 1tqgA | 1v0wA | 1w1hA | 1x2iA | 1y93A |
| 1orrA | 1qowD | 1ryoA | 1tt8A | 1v2xA | 1w23A | 1x46A | 1y9lA |
| 1ou8B | 1qq5A | 1ryqA | 1tu7A | 1v30A | 1w2lA | 1x54A | 1y9zA |
| 1ouwA | 1qqfA | 1s1dA | 1tu9A | 1v37A | 1w4sA | 1x6iB | 1yb3A |
| 1ow4A | 1qs1A | 1s1fA | 1tuaA | 1v3wA | 1w53A | 1x6oA | 1ybkA |
| 1ox0A | 1qtnB | 1s29A | 1tukA | 1v4pA | 1w5qA | 1x6zA | 1yc5A |
| 1oxxK | 1qtwA | 1s2oA | 1tvga | 1v5dA | 1w5rB | 1x7dA | 1yd0A |
| 1oygA | 1qv1A | 1s3cA | 1tvnA | 1v5iB | 1w66A | 1x8qA | 1yd9A |
| 1oz2A | 1qv9A | 1s8nA | 1tzpA | 1v5vA | 1w6sA | 1x91A | 1ye8A |
| 1oznA | 1qveA | 1s9rA | 1tzvA | 1v6pA | 1w6sB | 1x9dA | 1yfqA |
| 1p0hA | 1qw2A | 1s9uA | 1u07A | 1v70A | 1w70A | 1x9iA | 1yg9A |
| 1p0zA | 1qw9B | 1sauA | 1u0kB | 1v7rA | 1w7cA | 1xbiA | 1ylxA |
| 1p1mA | 1qwgA | 1sbyA | 1u2hA | 1v7wA | 1w9sA | 1xd3A | 1ymtA |
| 1p1xA | 1qwkA | 1senA | 1u53A | 1v7zA | 1wb4A | 1xdnA | 1yn3A |
| 1p3cA | 1qwoA | 1sfsA | 1u69A | 1v8cA | 1wcuA | 1xdzA | 1yn9A |
| 1p4cA | 1qxyA | 1sfxA | 1u7gA | 1v8hA | 1wcwA | 1xeoA | 1ynpB |
| 1p4oA | 1r0mA | 1sg4A | 1u7iA | 1v9yA | 1wddA | 1xg0A | 1ypyA |
| 1p5dX | 1r26A | 1sh8A | 1u84A | 1vbwA | 1wddS | 1xg0C | 1yqsA |
| 1p5zB | 1r29A | 1shuX | 1u8vC | 1vc3A | 1werA | 1xg4A | 1ys1X |
| 1p6oA | 1r2qA | 1sj1A | 1u9cA | 1vccA | 1wfbA | 1xg5A | 1ys7A |
| 1p9gA | 1r45A | 1sjwA | 1uaiA | 1vd6A | 1whiA | 1xgkA | 1yt3A |
| 1p9hA | 1r55A | 1sjyA | 1uasA | 1vdwA | 1whzA | 1xjuA | 1yu0A |
| 1p9iA | 1r5lA | 1sk7A | 1ucdA | 1ve4A | 1wkqA | 1xk7A | 1yuzA |
| 1pb7A | 1r5mA | 1smoA | 1ucrA | 1vefA | 1wkrA | 1xknA | 1z0nC |
| 1pbjA | 1r62A | 1sn9A | 1ucsA | 1vfyA | 1wl8A | 1xlqA | 1z0wA |
| 1pe9A | 1r6dA | 1snnA | 1uf5A | 1vh5A | 1wluA | 1xmka | 1z1sA |
| 1pkhA | 1r6jA | 1so7A | 1ufoA | 1vhnA | 1wlyA | 1xmtA | 1z2nX |
| 1pkoA | 1r6xA | 1sqSA | 1ufyA | 1vhtA | 1wlzA | 1xocA | 1z2uA |
| 1pmhX | 1r7jA | 1svfA | 1ug6A | 1vhuA | 1wm3A | 1xodA | 1z3eA |
| 1po5A | 1r8sE | 1svfB | 1ugiA | 1viaA | 1wmaA | 1xppA | 1z3eB |
| 1pp0A | 1r9lA | 1svsA | 1ugxB | 1vimA | 1wmdA | 1xqoA | 1z3xA |
| 1psrA | 1ra0A | 1sx5A | 1uheA | 1vioA | 1wmhA | 1xrka | 1z67A |
| 1pvmA | 1rcqA | 1sz7A | 1ui0A | 1vjka | 1wmhB | 1xs0A | 1z6mA |
| 1pwaA | 1rdqI | 1szhA | 1ujpA | 1vjuA | 1wmsA | 1xsza | 1z6nA |
| 1pz4A | 1rfyA | 1t1gA | 1uk8A | 1vk1A | 1wmwA | 1xt5A | 1z72A |
| 1pz7A | 1rg8B | 1t1uA | 1ukfA | 1vkeA | 1wn2A | 1xtaA | 1zceA |
| 1q0rA | 1rgyA | 1t1vA | 1ukka | 1vkiA | 1wnaA | 1xteA | 1zdyA |
| 1q1fA | 1rh9A | 1t3yA | 1unqA | 1vkkA | 1wnyA | 1xu9A | 1zhvA |
| 1q35A | 1rjuV | 1t61A | 1uoyA | 1vl1A | 1wpaA | 1xubA | 1zhxA |

|       |       |       |       |       |       |       |       |
|-------|-------|-------|-------|-------|-------|-------|-------|
| 1zi8A | 2b97A | 2c78A | 2dhoA | 2f46A | 2g8sA | 2hhgA | 2ivyA |
| 1zjaA | 2b9dA | 2c8sA | 2dkjA | 2f5tX | 2gb4B | 2hi0A | 2iw1A |
| 1zk4A | 2bayA | 2c92A | 2dkoA | 2f60K | 2gcuA | 2hinA | 2iwrA |
| 1zk5A | 2bbrA | 2c9jH | 2dkoB | 2f62A | 2gecA | 2hiyA | 2ixmA |
| 1zkeA | 2bceA | 2calA | 2dlbA | 2f69A | 2gf3A | 2hlrA | 2iyvA |
| 1zkpA | 2bcmB | 2carA | 2dpfA | 2f6uA | 2ggcA | 2hlyA | 2izrA |
| 1zl0A | 2bdrA | 2cb8A | 2dplA | 2f8aA | 2ghsA | 2ho2A | 2izxA |
| 1zmaA | 2bf6A | 2cbzA | 2driA | 2f8yA | 2gj3A | 2hoxD | 2j05A |
| 1zmmA | 2bf9A | 2cc0A | 2drtA | 2f9hA | 2gj4A | 2hp0A | 2j1aA |
| 1zoiA | 2bfdA | 2cc6A | 2drxA | 2faoA | 2gkeA | 2hpwA | 2j1vA |
| 1zr6A | 2bfdB | 2ccqA | 2ds5A | 2fb6A | 2gkgA | 2hqsH | 2j2jA |
| 1zuuA | 2bgkA | 2ccvA | 2dskA | 2fbaA | 2gkpA | 2hqxA | 2j43A |
| 1zuyA | 2bh4X | 2cdcB | 2dt4A | 2fcjA | 2gl5A | 2hs1A | 2j5gA |
| 1zv1B | 2bhuA | 2cdpA | 2dt8A | 2fclA | 2glzA | 2hsjA | 2j5yA |
| 1zx6A | 2bjdA | 2ce0A | 2dtjA | 2fcoA | 2gmwA | 2htdA | 2j6bA |
| 1zzkA | 2bjiA | 2ce2X | 2dtxB | 2fctA | 2gmyA | 2huhA | 2j6lA |
| 1zzwA | 2bjkA | 2cf7E | 2dvmA | 2fcwA | 2gomA | 2hw2A | 2j6vA |
| 2a0bA | 2bk9A | 2cg7A | 2dwuA | 2fcwB | 2gpiA | 2hwnE | 2j73B |
| 2a26A | 2bkfA | 2ci1A | 2dxaA | 2fdnA | 2gqtA | 2hx0A | 2j82A |
| 2a35A | 2bklA | 2ciaA | 2dxuA | 2fe5A | 2gqwA | 2hx5A | 2j8bA |
| 2a3nA | 2bkmA | 2cibA | 2dy0A | 2fg1A | 2grrB | 2hxsA | 2j8kA |
| 2a4xA | 2bkxA | 2cirA | 2dy1A | 2fgqX | 2gs5A | 2hykA | 2j9oC |
| 2a6zA | 2bl8A | 2ciuA | 2e0qA | 2fh1A | 2gs8A | 2i24N | 2j9wA |
| 2a8nA | 2blnA | 2ciwA | 2e3hA | 2fhpA | 2gsoA | 2i33A | 2jaeB |
| 2a8yA | 2bmoA | 2cjtA | 2e3nA | 2fhzA | 2gu9A | 2i3dA | 2jbaA |
| 2absA | 2bmoB | 2ckkA | 2e4tA | 2fhzB | 2gudB | 2i49A | 2jc5A |
| 2agkA | 2bo9B | 2cksA | 2e5fA | 2fi1A | 2guhA | 2i4aA | 2jc9A |
| 2ahfA | 2bogX | 2cm2A | 2e6fA | 2fj8A | 2guiA | 2i51A | 2jcbA |
| 2aibA | 2bpdA | 2cnqA | 2e7zA | 2fkkA | 2gwmA | 2i53A | 2jdaA |
| 2aiqA | 2brfA | 2covD | 2eabA | 2fl4A | 2gxgA | 2i5fA | 2jdcA |
| 2akfA | 2bryA | 2cpgA | 2eaqA | 2flhA | 2gxqA | 2i5uA | 2je6A |
| 2akzA | 2bsyA | 2cs7A | 2eb4A | 2fmaA | 2gyqA | 2i5vO | 2je6B |
| 2amlA | 2bt6A | 2cuaB | 2ebbA | 2fnuA | 2gz4A | 2i61A | 2je6I |
| 2anxA | 2bt9C | 2cveA | 2ecuA | 2fp1A | 2gzqA | 2i8tA | 2jekA |
| 2ap3A | 2bv2A | 2cviA | 2egvA | 2fq3A | 2gzsA | 2ia1A | 2jenA |
| 2apjA | 2bw8A | 2cwsA | 2eh3A | 2fr5A | 2gzvA | 2ia7A | 2jepA |
| 2arcA | 2bwfB | 2cxaA | 2ehgA | 2frgP | 2h1vA | 2iayA | 2jfrA |
| 2arrA | 2bwqA | 2cxnA | 2ehpA | 2fsqA | 2h2bA | 2ibdA | 2jg0A |
| 2asbA | 2bwrA | 2cxyA | 2ehzA | 2fsrA | 2h30A | 2ibnA | 2jhfB |
| 2asfA | 2bz1A | 2cyjA | 2eiya | 2ftrA | 2h3lA | 2ic2A | 2jilA |
| 2askA | 2bzvA | 2cz2A | 2ekpA | 2fulA | 2h5cA | 2ic6A | 2jisA |
| 2axwA | 2c07A | 2czlA | 2elcA | 2fupA | 2h6fA | 2iciA | 2jjaA |
| 2aydA | 2c0aA | 2czqA | 2endA | 2fvyA | 2h6fB | 2icrA | 2jjuA |
| 2ayhA | 2c0cA | 2czsA | 2eplX | 2fwhA | 2h7zB | 2ii2A | 2jkhL |
| 2b06A | 2c1vA | 2d1sA | 2erfA | 2fyfA | 2h8eA | 2ij2A | 2jkuA |
| 2b0aA | 2c2nA | 2d3dA | 2et1A | 2g1uA | 2h8gA | 2ilkA | 2jliA |
| 2b0vA | 2c2uA | 2d3yA | 2ev1A | 2g2cA | 2ha8A | 2imfA | 2mcmA |
| 2b2hA | 2c3nA | 2d5mA | 2evbA | 2g30A | 2halA | 2imhA | 2mhrA |
| 2b3fF | 2c3vA | 2d5wA | 2eveA | 2g3rA | 2hbaA | 2imjA | 2nliA |
| 2b3gB | 2c46A | 2d68A | 2ew0A | 2g5rA | 2hbwa | 2imqX | 2nlrA |
| 2b4hA | 2c4jA | 2d8dA | 2ex2A | 2g6fX | 2hc1A | 2inwA | 2nlsA |
| 2b5aA | 2c5aA | 2ddrA | 2f01A | 2g6yA | 2hd9A | 2ip6A | 2nlvA |
| 2b5wA | 2c60A | 2ddxA | 2f1kA | 2g7oA | 2hdoA | 2it2A | 2nmlA |
| 2b69A | 2c61A | 2de3A | 2f22A | 2g7sA | 2heuA | 2iu5A | 2nn5A |
| 2b7uA | 2c6uA | 2debA | 2f23A | 2g81I | 2hewF | 2iumA | 2nnuA |
| 2b82A | 2c71A | 2dejA | 2f3yB | 2g84A | 2hhcA | 2iuwA | 2nnuB |

|       |       |       |       |       |       |       |       |
|-------|-------|-------|-------|-------|-------|-------|-------|
| 2nqtA | 2oqzA | 2pqcA | 2qskA | 2uvkA | 2vqrA | 2wn3B | 2xfrA |
| 2nqwA | 2orwA | 2pqxA | 2qswA | 2ux9A | 2vuvA | 2wnfA | 2xguA |
| 2nr7A | 2os0A | 2pr7A | 2qt1A | 2uxwA | 2vw8A | 2wnkA | 2xhfB |
| 2nrrA | 2os5A | 2prvA | 2qudA | 2uy2A | 2vwsA | 2wnpF | 2xhgA |
| 2nszA | 2osxA | 2prxA | 2qvgA | 2uytA | 2vxnA | 2wnvB | 2xhiA |
| 2nuhA | 2ou5A | 2psfA | 2qvkA | 2v03A | 2vxtI | 2wnvD | 2xi8A |
| 2nw8A | 2ousA | 2pu3A | 2qxfA | 2v1mA | 2vy8A | 2wolA | 2xioA |
| 2nwfA | 2ov0A | 2pv2A | 2qzcA | 2v1qB | 2vyoA | 2woyA | 2xirA |
| 2nwrA | 2ovgA | 2pvbA | 2r01A | 2v25A | 2vzcA | 2wq4A | 2xj4A |
| 2nxvA | 2ovjA | 2pwaA | 2r0xA | 2v27A | 2vzpA | 2wqfA | 2xjpA |
| 2nxwA | 2oxcA | 2pxxA | 2r16A | 2v33A | 2w15A | 2wqkB | 2xkiA |
| 2o0aA | 2oxgY | 2py5A | 2r1jL | 2v3gA | 2w1jA | 2wraA | 2xmjA |
| 2o0bA | 2oxgZ | 2pyqA | 2r2zA | 2v3iA | 2w1rA | 2wryA | 2xn6A |
| 2o0mA | 2oy9A | 2pyxB | 2r31A | 2v3zA | 2w1sA | 2wsbA | 2xn6B |
| 2o1qA | 2oyoA | 2q0lA | 2r4iB | 2v4xA | 2w1vA | 2wsdA | 2xnqA |
| 2o2xA | 2ozhA | 2q1sA | 2r5oA | 2v52M | 2w31A | 2wtgA | 2xodA |
| 2o5gB | 2ozjA | 2q2fA | 2r6jA | 2v6kA | 2w39A | 2wtmA | 2xolA |
| 2o60B | 2oznA | 2q3gA | 2r6uA | 2v6uA | 2w3gA | 2wtpA | 2xomA |
| 2o6nA | 2oznB | 2q3tA | 2r6vA | 2v6vA | 2w3pA | 2wu9B | 2xpW  |
| 2o6pA | 2oztA | 2q3wA | 2r78A | 2v76A | 2w3qA | 2wuhA | 2xqqA |
| 2o6yA | 2p0nA | 2q52A | 2r8eA | 2v7fA | 2w3zA | 2wuhB | 2xrhA |
| 2o7aA | 2p0sA | 2q5cA | 2r8qA | 2v89A | 2w40A | 2wujA | 2xryA |
| 2o7iA | 2p14A | 2q7dA | 2r9fA | 2v8fA | 2w50A | 2wvfA | 2xs2A |
| 2o7rA | 2p17A | 2q7wA | 2ra6A | 2v8tB | 2w5aA | 2ww6A | 2xtpA |
| 2o8qA | 2p2sA | 2q8kA | 2ra9A | 2v9lA | 2w5qA | 2wweA | 2xtsA |
| 2o90A | 2p39A | 2q9kA | 2rafB | 2v9vA | 2w6aA | 2wwxB | 2xtsB |
| 2o9sA | 2p4fA | 2q9oB | 2rb7A | 2vb1A | 2w72D | 2wy4A | 2xttA |
| 2o9uX | 2p4hX | 2qa9E | 2rb8A | 2vbfA | 2w7aA | 2wz8A | 2xu3A |
| 2oa2A | 2p51A | 2qb7A | 2rbdB | 2vbkA | 2w7zA | 2wz9A | 2xuvA |
| 2oaaA | 2p5kA | 2qcpX | 2rbkA | 2vc8A | 2w87B | 2wzbA | 2xvmA |
| 2ob3A | 2p6wA | 2qe8B | 2rc3A | 2vchA | 2w8tA | 2wzoA | 2xw6A |
| 2ob5A | 2p7oA | 2qf4A | 2rc8A | 2vclA | 2w8xA | 2x1fA | 2xw9A |
| 2oc3A | 2p8iA | 2qfaA | 2rdgA | 2vcnA | 2w91A | 2x2sA | 2xwlA |
| 2octA | 2p9wA | 2qfaB | 2rdqA | 2vd8A | 2w9hA | 2x32A | 2xwsA |
| 2odiA | 2pa7A | 2qfaC | 2re2A | 2ve8A | 2wagA | 2x3hB | 2xwvA |
| 2odkA | 2pagA | 2qfeA | 2rffA | 2vezA | 2wawA | 2x3mA | 2xz2A |
| 2ofcA | 2pbdV | 2qguA | 2rfrA | 2vfoA | 2wb9A | 2x46A | 2xziB |
| 2ofkA | 2pc1A | 2qhlA | 2rfvA | 2vfrA | 2wbqA | 2x49A | 2y0oA |
| 2ofzA | 2pefA | 2qhsA | 2rh2A | 2vh3A | 2wcjA | 2x4kA | 2y27A |
| 2og5A | 2pezA | 2qikA | 2rhfA | 2vhaA | 2wcwA | 2x4lA | 2y3cA |
| 2oh1A | 2pfiA | 2qipA | 2rhwa | 2vifA | 2wdcA | 2x5nA | 2y53A |
| 2ohwA | 2pgeA | 2qjlA | 2rikA | 2vimA | 2wdsA | 2x5oA | 2y5pD |
| 2oizA | 2pgnA | 2qjwD | 2rilA | 2vk2A | 2we5B | 2x5pA | 2y6xA |
| 2oizD | 2phnA | 2qjzB | 2rk3A | 2vk8A | 2wfiA | 2x5xA | 2y71A |
| 2okfA | 2pieA | 2qkvA | 2rk5A | 2vlaA | 2wfwA | 2x5yA | 2y78A |
| 2oktA | 2pkfA | 2ql8A | 2rk9A | 2vmhA | 2wh6A | 2x8sB | 2y7eA |
| 2olmA | 2plrA | 2qltA | 2rklA | 2vn6A | 2wh7A | 2x9gA | 2y8kA |
| 2olnA | 2plxB | 2qmlA | 2rkna | 2vngA | 2wi8A | 2x9oA | 2y8yA |
| 2omla | 2pm1A | 2qngA | 2rkqA | 2vokA | 2wiyA | 2x9zA | 2y9uA |
| 2ooaA | 2pn6A | 2qnkA | 2rkvA | 2vovA | 2wj5A | 2xdpA | 2ybyA |
| 2oocA | 2pndA | 2qnlA | 2rl8B | 2vpaA | 2wk1A | 2xdwA | 2yc3A |
| 2opcA | 2pneA | 2qntA | 2tpsA | 2vpna | 2wkjA | 2xepA | 2ycdA |
| 2opgA | 2pofA | 2qpxA | 2uu8A | 2vptA | 2wkkB | 2xetA | 2yd6A |
| 2opjA | 2posA | 2qr6A | 2uuqA | 2vq2A | 2wlrA | 2xeuA | 2yexA |
| 2oplA | 2pq7A | 2qrlA | 2uuyB | 2vq8A | 2wlvA | 2xevA | 2yfoA |
| 2oqgA | 2pq8A | 2qsbA | 2uv4A | 2vqpA | 2wmfA | 2xfdA | 2yh5A |

|       |       |       |       |       |       |       |       |
|-------|-------|-------|-------|-------|-------|-------|-------|
| 2yh6A | 2zw2A | 3ayjA | 3bqxA | 3covA | 3ds4A | 3exvA | 3fynA |
| 2yhgA | 2zwsA | 3azdA | 3br8A | 3cp5A | 3dsbA | 3ey6A | 3fz4A |
| 2yimA | 2zxyA | 3b0fB | 3brcA | 3cp7A | 3dskA | 3eyeA | 3g0kA |
| 2ykzA | 2zyoA | 3b0gA | 3bs4A | 3crnA | 3dsoA | 3eyiA | 3g16A |
| 2ylnA | 2zzvA | 3b0sA | 3bt5A | 3ct5A | 3duwA | 3f0dA | 3g1pA |
| 2ymvA | 3a02A | 3b0tA | 3buuA | 3ct6A | 3dwgA | 3f14A | 3g21A |
| 2yn0A | 3a07A | 3b0xA | 3buxB | 3ctpA | 3dwgC | 3f11A | 3g36C |
| 2yogA | 3a09A | 3b1nA | 3bvfa | 3ctzA | 3dxlA | 3f1pB | 3g46A |
| 2yv9A | 3a0mA | 3b34A | 3bvxA | 3cu9A | 3dxyA | 3f2zA | 3g48A |
| 2yveA | 3a0sA | 3b4nA | 3bwhA | 3cuza | 3e0eA | 3f40A | 3g4eA |
| 2yvtA | 3a0yA | 3b4qA | 3bwvB | 3cvbA | 3e0xA | 3f43A | 3g5sA |
| 2ywiA | 3a16A | 3b4uA | 3bwxA | 3cwnA | 3e10B | 3f44A | 3g5tA |
| 2ywkA | 3a1hA | 3b5mA | 3bwzA | 3cwrB | 3e23A | 3f4sA | 3g7nA |
| 2ywlA | 3a1sA | 3b5nA | 3by4A | 3cx2A | 3e2dA | 3f5vA | 3g7rA |
| 2yxmA | 3a2zA | 3b5nC | 3by8A | 3cxnA | 3e2oA | 3f6cA | 3g89A |
| 2yxoA | 3a35A | 3b5nD | 3c2uA | 3cypB | 3e2vA | 3f6vA | 3g91A |
| 2yykA | 3a4rA | 3b5oA | 3c3yA | 3cz1A | 3e3mA | 3f6yA | 3g9yA |
| 2yzvA | 3a57A | 3b64A | 3c5eA | 3czxA | 3e3uA | 3f7eA | 3ga3A |
| 2yzyA | 3a5fA | 3b79A | 3c6aA | 3d02A | 3e48A | 3f7xA | 3ga4A |
| 2z08A | 3a6rA | 3b9tB | 3c70A | 3d06A | 3e4gA | 3f8dA | 3ga7A |
| 2z0jA | 3a72A | 3b9wA | 3c7mA | 3d0jA | 3e4vA | 3f8xD | 3gaeA |
| 2z26A | 3a8gA | 3ba1A | 3c8cA | 3d1pA | 3e7rL | 3f9mA | 3gbwA |
| 2z3hA | 3a8gB | 3ba3A | 3c8lB | 3d22A | 3e8mD | 3f9xA | 3gd6A |
| 2z4uA | 3a99A | 3bb0A | 3c8wC | 3d2qA | 3e8oB | 3fbgA | 3ge3A |
| 2z51A | 3a9fA | 3bb7A | 3c8zA | 3d3bA | 3e8tA | 3fcnA | 3ge3B |
| 2z5wA | 3a9jC | 3bc9A | 3c9aA | 3d3bJ | 3e8yX | 3fdeA | 3ge3C |
| 2z6oA | 3a9sA | 3bcwB | 3c9uA | 3d40A | 3e9tA | 3fdxA | 3ge3E |
| 2z6rA | 3a9zA | 3bd1A | 3c9zA | 3d4eA | 3ea6A | 3fedA | 3gfaA |
| 2z72A | 3aalA | 3bdiA | 3ca7A | 3d59A | 3eazA | 3fegA | 3gg7A |
| 2z8xA | 3aamA | 3bedA | 3caoA | 3d5pA | 3ebtA | 3fg9A | 3ghaA |
| 2z98A | 3abnA | 3beuA | 3cayA | 3d7jA | 3ebvA | 3fghA | 3ghjA |
| 2zadA | 3achA | 3bexA | 3cb0A | 3d9aL | 3ec6A | 3fgvA | 3girA |
| 2zatA | 3acxA | 3bf7A | 3cbwA | 3d9nA | 3ec9A | 3fgyA | 3giuA |
| 2zblA | 3admA | 3bfoA | 3cbzA | 3d9xA | 3edhA | 3fh1A | 3giwA |
| 2zbxA | 3agnA | 3bguA | 3ccdA | 3da8B | 3ednA | 3fiaA | 3gj0A |
| 2zcmA | 3agtA | 3bhdA | 3ccgA | 3daqA | 3edoB | 3filA | 3gjuA |
| 2zcwA | 3ah9A | 3bhqB | 3cecA | 3dasA | 3ef8A | 3fiqA | 3gijA |
| 2zdpA | 3aiaA | 3bhwa | 3ch0A | 3db7A | 3einA | 3fjuB | 3gkjA |
| 2zexB | 3aj3A | 3bjeB | 3chjA | 3deoA | 3ej9A | 3fk8A | 3gkrA |
| 2zfdA | 3aj4A | 3bkrA | 3chmA | 3dfgA | 3ej9B | 3fkeA | 3gmgA |
| 2zfdB | 3aj6B | 3bkwB | 3chvA | 3dg6A | 3ejfA | 3fmyA | 3gmxB |
| 2zfiA | 3aj7A | 3blnA | 3ci3A | 3dhaA | 3ejvA | 3fo3A | 3gneA |
| 2zhjA | 3ajdA | 3bm7A | 3ci6A | 3di4B | 3ekgA | 3fojA | 3gnlA |
| 2zhnA | 3ajxA | 3bmva | 3cijA | 3djeB | 3ekiA | 3fpcA | 3gnzP |
| 2zk9X | 3ak2A | 3bmxA | 3cimA | 3dk9A | 3elfA | 3fpwA | 3go5A |
| 2zl7A | 3ak8A | 3bmzA | 3cjmA | 3dkmA | 3en0A | 3fr7A | 3gocB |
| 2znrA | 3akbA | 3bnjA | 3cjsA | 3dkrA | 3eo6B | 3frhA | 3goeA |
| 2zouA | 3aksA | 3bo5A | 3cjsB | 3dlcA | 3eoiA | 3fsaA | 3gohA |
| 2zpmA | 3alfA | 3bo6A | 3cjwA | 3dmgA | 3eojA | 3fsoA | 3goxA |
| 2zptX | 3aljA | 3boeA | 3ckcA | 3dnjA | 3eqxB | 3fssA | 3gp2B |
| 2zq0A | 3amnB | 3bomA | 3ckkA | 3do8A | 3er7A | 3ftdA | 3gp6A |
| 2zs0A | 3amrA | 3bonA | 3ckmA | 3douA | 3erpA | 3futA | 3gpiA |
| 2zs0B | 3aofB | 3bpkA | 3cl6A | 3dqpA | 3essA | 3fw9A | 3gpkA |
| 2zs0C | 3aowA | 3bptA | 3clmA | 3dqyA | 3etjA | 3fwkA | 3gr3A |
| 2zs0D | 3arxA | 3bpvA | 3cm3A | 3dr4A | 3eurA | 3fxaA | 3grdB |
| 2zuxB | 3aslA | 3bqpA | 3cmbD | 3drfA | 3ewyA | 3fymA | 3gruA |

|       |       |       |       |       |       |       |       |
|-------|-------|-------|-------|-------|-------|-------|-------|
| 3gv3A | 3hpwC | 3iuoA | 3kmhA | 3lhnA | 3mdqA | 3nepX | 3ocjA |
| 3gveA | 3hr6A | 3iuwB | 3knbA | 3lhqA | 3mduA | 3neqA | 3ocuA |
| 3gwaA | 3hs3A | 3iv0A | 3knbB | 3lhsA | 3me7A | 3neuA | 3odtB |
| 3gwiA | 3ht1A | 3iv4A | 3korA | 3ljmA | 3meaA | 3nfkA | 3odvA |
| 3gwkC | 3htnA | 3ivvA | 3kpbA | 3lk7A | 3milA | 3nftA | 3oe3A |
| 3gxhA | 3hu5A | 3ivyA | 3kpeB | 3lkmA | 3mjeA | 3nfwA | 3of5A |
| 3gy9A | 3huhA | 3ivzA | 3kruA | 3lloA | 3mjfA | 3nggA | 3ofgA |
| 3gybA | 3hupA | 3iwfA | 3krcB | 3lluA | 3mk1A | 3ngpA | 3og2A |
| 3gzaB | 3hv2A | 3iwlA | 3ktpB | 3lm3A | 3ml1A | 3nhiA | 3ognA |
| 3gzbF | 3hv8A | 3ix3A | 3ktzB | 3lmzA | 3ml1B | 3nirA | 3oheA |
| 3gzbB | 3hwuA | 3ixlA | 3ku3B | 3lnyA | 3mmhA | 3nj2A | 3om0A |
| 3gzxA | 3hx8B | 3jq0A | 3kuvA | 3lo8A | 3mn5S | 3njnA | 3omdA |
| 3gzxB | 3hynA | 3jq1A | 3kweA | 3lopA | 3moyA | 3nkeA | 3omyA |
| 3h0nA | 3hz8A | 3jrvA | 3kwrA | 3lq0A | 3mozA | 3nnbA | 3on9A |
| 3h0oA | 3hzaA | 3js8A | 3kxqA | 3lqbA | 3mpcA | 3no0A | 3ondA |
| 3h0uA | 3hzpA | 3jsyA | 3kyjA | 3lqwA | 3mqdA | 3no2A | 3oo8A |
| 3h31A | 3i10A | 3jtzA | 3kyjB | 3lrtA | 3mqhA | 3no7A | 3oooA |
| 3h3hA | 3i2kA | 3ju4A | 3kyzA | 3ls9A | 3mqzA | 3nohA | 3oouA |
| 3h3lB | 3i2vA | 3judA | 3kz5E | 3lsnA | 3mr0A | 3noqA | 3ooxA |
| 3h4nA | 3i2zB | 3jumA | 3kzdA | 3lt7A | 3mstA | 3npdA | 3oqpA |
| 3h4oA | 3i3fA | 3jxoA | 3l12A | 3ltiA | 3mt0A | 3npkA | 3orkA |
| 3h4tA | 3i45A | 3jyoA | 3l1nA | 3lw3A | 3mu7A | 3nr5A | 3oruA |
| 3h4xA | 3i47A | 3jyzA | 3l1wA | 3lwcA | 3mvcA | 3nreD | 3otiA |
| 3h5jA | 3i4gA | 3jzyA | 3l32A | 3lwxA | 3mvgA | 3nrfB | 3ou2A |
| 3h6jA | 3i4oA | 3k01A | 3l41A | 3lx3A | 3mvsA | 3ns6A | 3ov5A |
| 3h74A | 3i6cA | 3k05A | 3l46A | 3ly0A | 3mwxA | 3ntvA | 3ov9A |
| 3h75A | 3i7mA | 3k0bA | 3l4aA | 3lydA | 3mwzA | 3nuaA | 3ox7P |
| 3h79A | 3i94A | 3k12A | 3l4eA | 3lyeA | 3mxnA | 3nufA | 3oxpA |
| 3h7hA | 3iarA | 3k1uA | 3l4nA | 3lyhB | 3mxnB | 3nvsA | 3oyvA |
| 3h7hB | 3ib5A | 3k1wA | 3l4rA | 3lypA | 3mxzA | 3nvwA | 3oz2A |
| 3h7iA | 3ib7A | 3k1zA | 3l51A | 3m07A | 3mybA | 3nvwB | 3ozyA |
| 3h87A | 3ie4A | 3k21A | 3l51B | 3m0fA | 3myxA | 3nvwC | 3p02A |
| 3h87C | 3ie7A | 3k2zA | 3l5lA | 3m0mA | 3mz2A | 3nwpA | 3p0bA |
| 3h8gF | 3iezA | 3k5jA | 3l77A | 3m0zA | 3mzfa | 3nwrA | 3p0fA |
| 3h9mA | 3ifeA | 3k67A | 3l81A | 3m3pA | 3n01A | 3nycA | 3p0kA |
| 3hcnA | 3igsB | 3k6iA | 3l84A | 3m5qA | 3n08A | 3nyqA | 3p1gA |
| 3hdxA | 3ihsA | 3k6mA | 3l8aA | 3m66A | 3n0rA | 3nytA | 3p3oA |
| 3hf5A | 3iisM | 3k6yA | 3l8wA | 3m6wA | 3n0uA | 3nyyA | 3p4hA |
| 3hfoA | 3ijlA | 3k7pA | 3l9aX | 3m6zA | 3n0xA | 3nzbX | 3p8gA |
| 3hhpA | 3ikwA | 3kanB | 3l9cA | 3m73A | 3n10A | 3nzlA | 3pa6A |
| 3hhtB | 3im9A | 3kb5A | 3laaA | 3m7aB | 3n17A | 3nznA | 3pb6X |
| 3hhya | 3imkA | 3kb9A | 3laeA | 3m8jA | 3n1fC | 3o12A | 3pd7A |
| 3hj4A | 3ip0A | 3kc2A | 3lagA | 3m9lA | 3n2wA | 3o22A | 3pe6A |
| 3hkwA | 3ipcA | 3ke7B | 3laxA | 3m9qA | 3n3mA | 3o2rA | 3pe8A |
| 3hlxA | 3ipjA | 3keoA | 3lb2A | 3mabA | 3n4iB | 3o2tA | 3pesA |
| 3hlzA | 3ipnA | 3kevA | 3ld7A | 3maoA | 3n4jA | 3o4pA | 3peyA |
| 3hm4B | 3iqtA | 3kffa | 3ldcA | 3mb5A | 3n6yA | 3o7bA | 3pf6A |
| 3hmcA | 3iquA | 3kgkA | 3ledA | 3mbkA | 3n6zA | 3o8mA | 3pfbA |
| 3hmzA | 3ir4A | 3kgyB | 3lf5A | 3mbrX | 3n79A | 3o8qA | 3pfeA |
| 3hnxA | 3irpX | 3kh1B | 3lfjA | 3mc3A | 3nbcA | 3o94A | 3pfgA |
| 3hnyM | 3irvA | 3khfA | 3lfaA | 3mcwB | 3nbmA | 3o9zA | 3phhA |
| 3ho6A | 3is3A | 3kizA | 3lfrA | 3mcxA | 3nd1A | 3oa3A | 3pidA |
| 3ho7A | 3isxA | 3kkfA | 3lftA | 3md1A | 3ndhA | 3oajA | 3piuA |
| 3hoiA | 3it3A | 3kkgA | 3lg3A | 3md7A | 3ndoA | 3oblA | 3piwA |
| 3hp7A | 3itfA | 3km5A | 3lhcA | 3md9A | 3ne8A | 3obqA | 3pjpA |
| 3hpcX | 3itqA | 3kmaA | 3lhiA | 3mdmA | 3nedA | 3oc7A | 3pjyA |

|       |       |       |       |       |       |       |       |
|-------|-------|-------|-------|-------|-------|-------|-------|
| 3pkvA | 3qpaA | 3rr6A | 3sy1A | 3tvtB | 3vc5A | 3wdnA | 3zn6A |
| 3pl8A | 3qr7A | 3rriA | 3sz3A | 3ty4A | 3vcaA | 3wdqA | 3znvA |
| 3pluA | 3qsdA | 3rt2A | 3szaA | 3tysA | 3vcxA | 3weoA | 3zojA |
| 3plwA | 3qu3A | 3rtlA | 3szhA | 3u2uA | 3ve9A | 3wg3B | 3zoqB |
| 3pmcA | 3qu5A | 3rwnA | 3szvA | 3u3gD | 3vejA | 3wgxA | 3zpyA |
| 3pmeA | 3qvpA | 3rx9A | 3szyA | 3u3lC | 3venA | 3wh1A | 3zqxA |
| 3pmoA | 3qwbA | 3ry0A | 3t0oA | 3u3zA | 3vg7A | 3wiwA | 3zr8X |
| 3pmsA | 3qx1A | 3ry4A | 3t2cA | 3u5sA | 3vgiA | 3wj1A | 3zrxA |
| 3pn3B | 3qxcA | 3rznA | 3t3lA | 3u62A | 3vglA | 3wjpa | 3zsjA |
| 3pnaA | 3qxzA | 3s0aA | 3t47A | 3u65B | 3vi6A | 3wjtA | 3zsuA |
| 3pnzA | 3qy1A | 3s2jA | 3t49A | 3u6gA | 3viiA | 3wkgA | 3ztvA |
| 3po8A | 3qzbA | 3s2rA | 3t4lA | 3u7qA | 3vj9A | 3wkqA | 3zucA |
| 3podA | 3qzmA | 3s44A | 3t7hA | 3u7qB | 3vk5A | 3wliA | 3zuzA |
| 3pojA | 3qzrA | 3s4eA | 3t7lA | 3u7rA | 3vl1A | 3wmqA | 3zvsA |
| 3ponA | 3qzxA | 3s57A | 3t7vA | 3u7zA | 3vl9A | 3wmtB | 3zxcA |
| 3powA | 3r0nA | 3s5mA | 3t8jA | 3u97A | 3vlaA | 3wmvB | 3zxfA |
| 3pp2A | 3r0vA | 3s6eA | 3t90A | 3u99A | 3vmkA | 3wn7B | 3zxkA |
| 3pp4P | 3r2qA | 3s6fA | 3t92A | 3u9rB | 3vmnA | 3wn8A | 3zxyA |
| 3pp5A | 3r3qA | 3s83A | 3t9wA | 3u9wA | 3vmvA | 3wndA | 3zy2A |
| 3pp9A | 3r3rA | 3s8mA | 3ta6A | 3ub6A | 3vn0A | 3wp4A | 3zy7A |
| 3pplA | 3r3sA | 3s8sA | 3tbnA | 3ubdA | 3vn3A | 3wpcB | 3zypA |
| 3pqaA | 3r41A | 3s9xA | 3tboA | 3uc7A | 3vorA | 3wqbA | 3zyqA |
| 3pqhA | 3r4zA | 3sbmA | 3tc2A | 3ue2A | 3vqiA | 3wqbB | 3zzoA |
| 3psmA | 3r5gA | 3sc7X | 3tc3A | 3uf7A | 3vrcA | 3wqcA | 3zzpA |
| 3pt5A | 3r5tA | 3scyA | 3tc8A | 3ufeA | 3vrdA | 3ws7A | 3zzsA |
| 3pu9A | 3r62A | 3sd2A | 3td3A | 3uffA | 3vrdB | 3wucA | 3zzyA |
| 3pucA | 3r68A | 3sebA | 3tdnA | 3ui4A | 3vsvB | 3wupA | 4a02A |
| 3pveA | 3r6dA | 3seeA | 3tduD | 3uidA | 3vtoA | 3wurA | 4a14A |
| 3pvhA | 3r72A | 3sfjA | 3teuA | 3ujcA | 3vubA | 3wuzA | 4a29A |
| 3pviA | 3r87A | 3sg0A | 3tewA | 3ujiP | 3vupA | 3wv7A | 4a2vA |
| 3px8X | 3r8jA | 3sggA | 3tfjA | 3uk0A | 3vurA | 3wvaA | 4a37A |
| 3pzgA | 3r9fA | 3sh4A | 3tg0A | 3uljA | 3vv1B | 3wvsA | 4a3pA |
| 3q1cA | 3rd5A | 3shgA | 3tg2A | 3ultA | 3vviA | 3wwcA | 4a3zA |
| 3q1xA | 3rfeB | 3shgB | 3tg7A | 3unvA | 3vvvA | 3wwlA | 4a42A |
| 3q2bA | 3rgaA | 3sigA | 3tj4A | 3up3A | 3vwCA | 3wwxA | 4a4jA |
| 3q2iA | 3rhbA | 3sjmA | 3tj8A | 3uplA | 3vwnX | 3wx7A | 4a4yA |
| 3q46A | 3rhgA | 3sk2A | 3tjmA | 3upvA | 3vypA | 3wy2A | 4a56A |
| 3q4oA | 3riqA | 3sk7A | 3tjrA | 3ur8A | 3vz9B | 3wydA | 4a6hA |
| 3q64A | 3rjtA | 3skxA | 3tm8A | 3urra | 3vz9D | 3weyA | 4a6qA |
| 3q6bA | 3rjuA | 3snfA | 3tn4A | 3uueA | 3vzxA | 3wz3A | 4a6rA |
| 3q7rA | 3rkgA | 3snoA | 3tnlA | 3uv9A | 3w06A | 3x0iA | 4a7uA |
| 3q8jA | 3rl5A | 3so6A | 3tnyA | 3uw3A | 3w07A | 3x0tA | 4a8tA |
| 3qatA | 3rlgA | 3soeA | 3tosA | 3uxjA | 3w0kA | 3x2mA | 4a9vA |
| 3qb8A | 3rm3A | 3sojA | 3towA | 3v0dA | 3w0oA | 3x34A | 4aaaA |
| 3qc0A | 3rnjA | 3sovA | 3tpdA | 3v1aA | 3w0tA | 3zbdA | 4aazA |
| 3qc7A | 3rnqB | 3sp7A | 3tq2A | 3v30A | 3w19C | 3zboB | 4ac1X |
| 3qftA | 3ro3A | 3sqzA | 3tq5A | 3v46A | 3w19D | 3zdbA | 4acjA |
| 3qguB | 3ro8A | 3sriB | 3tqeA | 3v4gA | 3w42A | 3zfpA | 4ae7A |
| 3qhbA | 3robA | 3ss7X | 3tqlA | 3v4kA | 3w56A | 3zhiA | 4af8A |
| 3qhpA | 3rofA | 3su6A | 3trdA | 3v5cA | 3w5sA | 3zhnA | 4affA |
| 3qjaA | 3rpcA | 3sukA | 3ts3A | 3v68A | 3w7tA | 3zhoA | 4afmA |
| 3qk8A | 3rpdA | 3suuA | 3tt9A | 3v75A | 3w7yA | 3zitA | 4ag1A |
| 3ql9A | 3rpeA | 3swoA | 3tutA | 3v7nA | 3w7yB | 3ziyA | 4ag7A |
| 3qnsA | 3rpzA | 3sx2A | 3tvjA | 3v7qA | 3wa2X | 3zjaA | 4agiA |
| 3qooA | 3rq9A | 3sxmA | 3tvjB | 3v9oA | 3wasB | 3zmrB | 4ak2A |
| 3qp4A | 3rqtA | 3sxxA | 3tvtA | 3va4A | 3wdcA | 3zn4A | 4ak8A |

|       |       |       |       |       |       |       |       |
|-------|-------|-------|-------|-------|-------|-------|-------|
| 4al0A | 4bpfA | 4cz5A | 4e69A | 4f0bA | 4gekA | 4he6A | 4icvA |
| 4alzA | 4bpsA | 4czgA | 4e6fA | 4f0jA | 4ggcA | 4hfqA | 4id0A |
| 4ammA | 4bpyA | 4d0pA | 4e6uA | 4f0wA | 4ggfA | 4hfsA | 4id9A |
| 4annA | 4bpzA | 4d0qA | 4e74A | 4f1vA | 4ggfC | 4hg2A | 4idcA |
| 4ao6A | 4bqnA | 4d6gA | 4e9oX | 4f2eA | 4ghnA | 4hguA | 4iedA |
| 4ao9A | 4brcA | 4d74A | 4e9sA | 4f2fA | 4gieA | 4hhrA | 4iejA |
| 4aohA | 4bt7A | 4d7jA | 4e9xC | 4f2lA | 4gjzA | 4hi7A | 4ifaA |
| 4aqoA | 4bu0A | 4d8bA | 4ea9A | 4f3jA | 4gmqA | 4hi8A | 4igiA |
| 4aruA | 4bvxA | 4db5A | 4eadA | 4f54A | 4gmuA | 4hi8B | 4iheA |
| 4at0A | 4bvxB | 4dd5A | 4eaeA | 4f66B | 4gneA | 4hjbC | 4ihmA |
| 4ateA | 4by8A | 4df0A | 4ebgA | 4f87A | 4gnrA | 4hjiA | 4ihzA |
| 4au1A | 4byzA | 4dgfA | 4ebjA | 4f8xA | 4gofA | 4hkgA | 4iikA |
| 4avrA | 4bz4A | 4di9A | 4ecfA | 4f98A | 4gosA | 4hlyA | 4iilA |
| 4avsE | 4c08A | 4djaA | 4ee6A | 4fayA | 4gqmA | 4hmsA | 4iiyA |
| 4aw7A | 4c1aA | 4dk2A | 4ee9A | 4fb2A | 4grzA | 4hnlA | 4ij5A |
| 4aweA | 4c24A | 4dm5A | 4eekA | 4fbjA | 4gs3A | 4hnoA | 4ikdA |
| 4axoA | 4c2vA | 4dm7A | 4eewA | 4fchB | 4gt8A | 4hojA | 4il7A |
| 4axyA | 4c2vC | 4dmiA | 4ef0A | 4fflA | 4gt9A | 4hpnA | 4in0A |
| 4ay0A | 4c5kA | 4dmtA | 4efiA | 4fglA | 4gucA | 4hq1A | 4in9A |
| 4ayoA | 4c6aA | 4dmvA | 4efpA | 4fh0A | 4gvfB | 4hqzA | 4incA |
| 4az6A | 4c72A | 4dn2A | 4eguA | 4fk9A | 4gvoA | 4hroA | 4ineA |
| 4b0hA | 4c81A | 4dn7A | 4ehuA | 4fn7A | 4gvqA | 4hs1A | 4inkA |
| 4b0zA | 4ca1A | 4dndA | 4eicA | 4fnvA | 4gvxD | 4hs2A | 4inwA |
| 4b15A | 4cayC | 4dnxB | 4eihA | 4fojA | 4gwbA | 4hstA | 4io2A |
| 4b1mB | 4cbpA | 4do4A | 4eirB | 4fp5D | 4gwG  | 4hstB | 4ipuA |
| 4b1yM | 4cc2A | 4dpbX | 4eisA | 4fr9A | 4gxwA | 4htfA | 4irxA |
| 4b21A | 4cd5A | 4dpzX | 4eivA | 4fs7A | 4gymA | 4htgA | 4itbA |
| 4b4uA | 4cd8A | 4dq6A | 4ekfA | 4ftfA | 4gyxA | 4hvkA | 4itcA |
| 4b5oA | 4cdjA | 4dq9A | 4emnA | 4fzlA | 4gzcA | 4hvyA | 4iumA |
| 4b62A | 4cdpA | 4dqaA | 4eo7A | 4fzpA | 4h14A | 4hwmA | 4iusA |
| 4b6gA | 4ce8C | 4dqjB | 4ep4A | 4g0xA | 4h15A | 4hwvA | 4ix3A |
| 4b89A | 4cfiA | 4dr8A | 4eq9A | 4g1qA | 4h17A | 4hy4A | 4ix7A |
| 4b8xA | 4cfqQ | 4driB | 4eqaC | 4g2eA | 4h27A | 4hz2A | 4iyaA |
| 4b9gA | 4cgsA | 4dt4A | 4eqbA | 4g3bA | 4h3uA | 4hzrA | 4iyjA |
| 4b9iA | 4chiA | 4dt5A | 4eqpA | 4g3nA | 4h4dA | 4i0wA | 4izbA |
| 4b9pA | 4ci7A | 4duiA | 4eqsA | 4g3oA | 4h4nA | 4i0wB | 4izxA |
| 4bb9A | 4ci9A | 4dvcA | 4ercA | 4g41A | 4h5iA | 4i1fA | 4j0dA |
| 4bboA | 4cicA | 4dwdA | 4errA | 4g4kA | 4h6cI | 4i1kA | 4j0eA |
| 4begA | 4cilA | 4dwoA | 4es1A | 4g54A | 4h6qA | 4i2uA | 4j1oA |
| 4beuA | 4cj0A | 4dwrA | 4es8A | 4g6tA | 4h7pA | 4i3gB | 4j27A |
| 4bfhA | 4cj0B | 4dxkA | 4esmA | 4g6tB | 4h7uA | 4i4eA | 4j3vA |
| 4bfoA | 4ck4A | 4dyqA | 4esrA | 4g78A | 4h7wA | 4i4oA | 4j42A |
| 4bgbA | 4cndA | 4dzhA | 4eswA | 4g7xA | 4h87A | 4i62A | 4j4zA |
| 4bgcA | 4cngA | 4dziA | 4etnA | 4g7xB | 4h89A | 4i66A | 4j5rA |
| 4bguA | 4cnnA | 4e15A | 4eu9A | 4g9eA | 4h8eA | 4i6rA | 4j6oA |
| 4bh5A | 4co8A | 4e19A | 4eunA | 4g9sA | 4ha4A | 4i6xA | 4j73A |
| 4bj0A | 4cogA | 4e29A | 4euoA | 4g9sB | 4hbqA | 4i6yA | 4j7aA |
| 4bjiA | 4cp6A | 4e2bA | 4evqA | 4ga2A | 4hbkA | 4i71A | 4j7nA |
| 4bjzA | 4cs4A | 4e2uA | 4evuA | 4gb5A | 4hc9A | 4i7wA | 4j7qA |
| 4bk7A | 4csrA | 4e2xA | 4ex6A | 4gb7A | 4hcjA | 4i84A | 4j8cA |
| 4bmhA | 4csrB | 4e3xA | 4exkA | 4gbuA | 4hcsA | 4i8hA | 4j8sA |
| 4bmna | 4cuaA | 4e3yA | 4eysA | 4gc3A | 4hddA | 4i8iA | 4j9tA |
| 4bn4A | 4cv7A | 4e40A | 4eyzA | 4gciA | 4hdeA | 4i93A | 4j9yB |
| 4bndA | 4cvrA | 4e4rA | 4ezgA | 4gcoA | 4hdrA | 4iauA | 4jb3A |
| 4boqA | 4cw4A | 4e4tA | 4eziA | 4ge6A | 4hdrB | 4ic4A | 4jb7A |
| 4bouA | 4cxpA | 4e4uA | 4f06A | 4geiA | 4hdtA | 4iciA | 4jbbA |



|       |       |       |       |       |       |       |       |
|-------|-------|-------|-------|-------|-------|-------|-------|
| 4jbdA | 4kqdA | 4lupA | 4mykA | 4nxyA | 4p8bA | 4q34A | 4r2xC |
| 4jccA | 4kqiA | 4lvuA | 4myzA | 4nyhA | 4p9iA | 4q3kA | 4r38A |
| 4jduA | 4kqpA | 4lwlA | 4mzcA | 4nyqA | 4pakA | 4q4gX | 4r3fA |
| 4je1A | 4kruA | 4lx2A | 4mzdA | 4nzkA | 4pbhA | 4q53A | 4r3nA |
| 4jedA | 4ks7A | 4lx3A | 4mzjA | 4o06A | 4pc9A | 4q68A | 4r52A |
| 4jejA | 4kt3A | 4lx3B | 4n02A | 4o0aA | 4pcaB | 4q6jA | 4r5rA |
| 4jemA | 4kt3B | 4lxqA | 4n03A | 4o0cA | 4pdnA | 4q6tA | 4r6hA |
| 4jerA | 4ku0A | 4lypA | 4n13A | 4o0kA | 4pdyA | 4q7eA | 4r6rE |
| 4jf1A | 4ku0D | 4lzxB | 4n1iA | 4o5fA | 4pe0A | 4q7oA | 4r6yA |
| 4jf8A | 4kv7A | 4m02A | 4n2kA | 4o6uA | 4pe3A | 4q7qA | 4r75A |
| 4jg2A | 4kxvA | 4m0wA | 4n2pD | 4o7hA | 4pf3A | 4q98A | 4r78A |
| 4jgiA | 4kzvB | 4m1gA | 4n30A | 4oa3A | 4pf4A | 4q9bA | 4r81A |
| 4jglA | 4l05A | 4m1qA | 4n3tA | 4oanA | 4pf8A | 4qa8A | 4r8hA |
| 4jguB | 4l2hA | 4m1uA | 4n4uA | 4ocvA | 4pfyB | 4qa9A | 4r8xA |
| 4jhtA | 4l2iA | 4m1xA | 4n5mA | 4od6A | 4ph2A | 4qasA | 4r9fA |
| 4jiuA | 4l2iB | 4m2mA | 4n5uA | 4odkA | 4ph8A | 4qb3A | 4r9pA |
| 4jjaA | 4l4eA | 4m51A | 4n67A | 4oe9A | 4phjA | 4qb6A | 4raxA |
| 4jk8A | 4l57A | 4m5eA | 4n6kA | 4oelA | 4phrA | 4qboA | 4rayA |
| 4jm1A | 4l5eA | 4m5rA | 4n7fA | 4ofaA | 4pi8A | 4qc6A | 4rbxA |
| 4jmpA | 4l6dA | 4m7tA | 4n8cX | 4ogdB | 4pioA | 4qdjA | 4rcjA |
| 4jn7A | 4l7xA | 4m82A | 4n8gA | 4oggA | 4pitD | 4qekA | 4rd4A |
| 4jnuA | 4l8aA | 4m8aA | 4nazA | 4oh7A | 4pj2A | 4qf3A | 4rd7A |
| 4jokA | 4l8pA | 4m91A | 4nbpA | 4ohjA | 4pj2C | 4qgoA | 4rdbA |
| 4jp6A | 4l9oA | 4m9kA | 4nbrA | 4ohnA | 4pklA | 4qhQA | 4reiA |
| 4jqfA | 4l9pA | 4m9vF | 4nbuA | 4oi3A | 4plzA | 4qhwA | 4rekA |
| 4jtmA | 4l9pB | 4maiA | 4ndoA | 4ojxA | 4pmoA | 4qi3B | 4reoA |
| 4jvuA | 4la2A | 4makA | 4ndoB | 4okiA | 4pmxA | 4qi8A | 4rexA |
| 4jwxA | 4lc3A | 4mamA | 4ndsA | 4oltB | 4pneB | 4qitA | 4rfuA |
| 4jxrA | 4ld1A | 4maqA | 4necA | 4om8A | 4pnoA | 4qkdA | 4rgdA |
| 4jz5A | 4ldcA | 4maxA | 4nesA | 4ombA | 4powA | 4qlpA | 4rgyA |
| 4jzzA | 4ldvA | 4mc3A | 4nf1A | 4onmA | 4pp4A | 4qlpB | 4ri5A |
| 4k0nA | 4lebA | 4mcoA | 4nfnA | 4onrA | 4pq9A | 4qm6A | 4ri6A |
| 4k12A | 4lerA | 4me2A | 4ng0A | 4opcA | 4pqdA | 4qnsA | 4rj2A |
| 4k12B | 4lf0A | 4mf5A | 4ni6A | 4oq9A | 4pqhA | 4qosA | 4rjwA |
| 4k3lA | 4lgjA | 4mfiA | 4nkpA | 4oqpA | 4pqqA | 4qp5A | 4rjzA |
| 4k7bA | 4lgtD | 4mijA | 4nl9A | 4oqvA | 4ps6A | 4qpNA | 4rk4A |
| 4k7zA | 4lgyA | 4miyA | 4nl9C | 4ou0A | 4pscA | 4qptA | 4rkfA |
| 4k82A | 4lhsA | 4mjdA | 4nlmA | 4oujB | 4psfA | 4qpWA | 4rl3A |
| 4k8gA | 4lixA | 4mjeA | 4nmuA | 4ousA | 4psrB | 4qqhA | 4rlcA |
| 4kalA | 4lizA | 4mkxA | 4nmwA | 4oxxA | 4pssA | 4qqSA | 4rleA |
| 4kbxA | 4ljiB | 4mllA | 4nn2A | 4oy3A | 4puxA | 4qrnA | 4rlzA |
| 4kdwA | 4lksA | 4mlvA | 4nn3A | 4oy5A | 4pvaA | 4qt3A | 4rp3A |
| 4kdxA | 4lkuA | 4mmgA | 4nnoA | 4oy7A | 4pvkA | 4qtcA | 4rpmA |
| 4kefA | 4lldA | 4mncA | 4noaA | 4p0tA | 4pw0A | 4qucA | 4rptA |
| 4kemA | 4lldB | 4mnoA | 4nobA | 4p0zA | 4pwoA | 4qusA | 4rqrA |
| 4kg7A | 4lmyA | 4mq3A | 4nogA | 4p32B | 4pxeA | 4qwoA | 4rriA |
| 4kgdA | 4lowA | 4mqbA | 4nohA | 4p3hA | 4pxyA | 4qxbB | 4rs2A |
| 4kh7A | 4lplA | 4mtmA | 4novA | 4p3vA | 4pyrA | 4qxbC | 4rt5A |
| 4kh8A | 4lpqA | 4mtuA | 4npdA | 4p40A | 4pz0A | 4qxlA | 4rthA |
| 4kl0A | 4lr2A | 4mupA | 4nsmA | 4p47A | 4pz3A | 4qy7A | 4ru1A |
| 4kliA | 4lrtA | 4muqA | 4nsvA | 4p5eA | 4pzjA | 4qytA | 4ru3A |
| 4km6A | 4lrtB | 4muvA | 4ntdA | 4p5nA | 4q27A | 4r03A | 4ru5A |
| 4kmgA | 4lruA | 4muzA | 4ntkA | 4p5pA | 4q29A | 4r16A | 4ruqB |
| 4kmrA | 4ltaA | 4mx6A | 4nutA | 4p7oA | 4q2lA | 4r1jA | 4ruwA |
| 4kn8A | 4luaA | 4mxtA | 4nutB | 4p7xA | 4q2qA | 4r1sA | 4rv5A |
| 4knkA | 4lukA | 4mydA | 4nx1B | 4p82A | 4q2sA | 4r1vA | 4rvqA |

|       |       |        |        |         |       |       |        |
|-------|-------|--------|--------|---------|-------|-------|--------|
| 4rwcA | 4udxX | 4w8pB  | 4x1zB  | 4y2mA   | 4z0gA | 4zvcA | 5aogA  |
| 4rwuA | 4ue0A | 4w9zA  | 4x2rA  | 4y6wA   | 4z0tA | 4zvfA | 5aotA  |
| 4rxtA | 4ue8A | 4wbjA  | 4x33A  | 4y7lA   | 4z0yA | 4zw9A | 5aovA  |
| 4rxuA | 4ue8B | 4wbtC  | 4x33B  | 4y88A   | 4z1rA | 4zwvA | 5aozA  |
| 4rxvA | 4ufqA | 4wbyA  | 4x54A  | 4y9iA   | 4z2oA | 4zx2A | 5apgA  |
| 4ry1A | 4uhcA | 4wcgA  | 4x5pA  | 4y9mA   | 4z39A | 4zy9B | 5aq0A  |
| 4ry9A | 4uhoA | 4wckA  | 4x7gA  | 4y9vA   | 4z3gA | 4zz1A | 5aulA  |
| 4ryaA | 4uhtA | 4wcxA  | 4x84A  | 4y9wA   | 4z47A | 5a0dA | 5avdA  |
| 4ryoA | 4uiqA | 4wdcA  | 4x8eA  | 4yaaA   | 4z4dA | 5a0lB | 5awoA  |
| 4rz9A | 4uj7A | 4we2A  | 4x9cA  | 4yagA   | 4z4jA | 5a0nA | 5ax0A  |
| 4s12A | 4ulvA | 4wecA  | 4x9jA  | 4yapA   | 4z67A | 5a0yA | 5azbA  |
| 4s1hA | 4umiA | 4weeA  | 4x9rA  | 4ybmA   | 4z6mB | 5a0yB | 5azwA  |
| 4s1pA | 4un2B | 4wepB  | 4x9tA  | 4ycbA   | 4z7eA | 5a0yC | 5azxB  |
| 4s28A | 4unuA | 4wesB  | 4x9xA  | 4ydrB   | 4z7xA | 5a10A | 5b08A  |
| 4s2xA | 4uobA | 4wf5A  | 4x9zA  | 4ye7A   | 4z80B | 5a12A | 5b1aD  |
| 4s36A | 4up0A | 4wfoA  | 4xa7A  | 4yecA   | 4z80C | 5a1iA | 5b1aE  |
| 4s39A | 4up3A | 4wfvA  | 4xbaB  | 4yecB   | 4z9hA | 5a1qA | 5b1aG  |
| 4s3jA | 4upiA | 4wh9A  | 4xcbA  | 4yepA   | 4za2D | 5a35A | 5b1aI  |
| 4tkcA | 4uqwA | 4whsC  | 4xcvA  | 4yfuA   | 4zavA | 5a3aA | 5b1aJ  |
| 4tm7A | 4uqxA | 4whsD  | 4xduA  | 4yg0A   | 4zbdA | 5a57A | 5b1aK  |
| 4tmxA | 4uqzB | 4wilA  | 4xdxA  | 4ygbD   | 4zbgA | 5a61A | 5b1aM  |
| 4tpnA | 4urfA | 4wiqA  | 4xedA  | 4yi8A   | 4zbhA | 5a62A | 5b1aN  |
| 4tpvA | 4usaA | 4wjiA  | 4xemA  | 4yjrA   | 4zblA | 5a67A | 5b1aP  |
| 4tqrA | 4utuA | 4wjtA  | 4xezA  | 4ykiA   | 4zboD | 5a6mA | 5b1aS  |
| 4tqxA | 4uu3B | 4wk7A  | 4xfjA  | 4yl8A   | 4zc3A | 5a71A | 5b1aU  |
| 4tr6A | 4uu5A | 4wkaA  | 4xfkA  | 4yl8B   | 4zceB | 5a7gA | 5b1aY  |
| 4troA | 4uulB | 4wlhA  | 4xfmA  | 4ylaA   | 4zd6F | 5a7vA | 5b1rA  |
| 4tsdB | 4uwwA | 4wn5A  | 4xfwA  | 4ymeA   | 4zeyA | 5a8cA | 5b1sA  |
| 4ttnA | 4uybA | 4wndB  | 4xhvA  | 4ymyA   | 4zfvB | 5a8jA | 5b4bB  |
| 4ttwA | 4uypA | 4wnoA  | 4xhyA  | 4ynhA   | 4zgfA | 5a95B | 5b4tA  |
| 4tvvA | 4uyrA | 4wp4A  | 4xijA  | 4ynuA   | 4zgwA | 5a99A | 5b4zA  |
| 4txrA | 4uzgA | 4wp9A  | 4xinA  | 4ynxA   | 4zh5B | 5a9tA | 5b5iA  |
| 4txrB | 4v0kA | 4wpgA  | 4xj5A  | 4yorA   | 4zhbA | 5ab8A | 5b5lA  |
| 4txrC | 4v0wB | 4wpkA  | 4xjwA  | 4ypoA   | 4zhwA | 5achA | 5b6cA  |
| 4txwA | 4v12A | 4wpyA  | 4xlbB  | 4yqdA   | 4zilA | 5acsB | 5b78B  |
| 4tyzA | 4v15A | 4wqdA  | 4xmhA  | 4yqyA   | 4zjhA | 5ad1A | 5b7gA  |
| 4tz1A | 4v1gA | 4wqkA  | 4xmrA  | 4ysiA   | 4zjuA | 5ae0A | 5b7hA  |
| 4tzhA | 4v1jA | 4wriA  | 4xosA  | 4yslA   | 4zl8A | 5aezA | 5b7yA  |
| 4u0oB | 4v1kA | 4wsfA  | 4xotA  | 4ytbA   | 4zldA | 5afwA | 5b89A  |
| 4u3yA | 4v1sA | 4wtpA  | 4xpxA  | 4ytdA   | 4zlfA | 5afyH | 5b8dA  |
| 4u5hA | 4v29A | 4wtxA  | 4xpzA  | 4ytkA   | 4zmkA | 5afyL | 5bjxA  |
| 4u5rA | 4v33A | 4wu0A  | 4xq7A  | 4ytwC   | 4zmyA | 5agdB | 5bk9B  |
| 4u7aA | 4v3iA | 4wu1A  | 4xqcA  | 4ytwD   | 4zo2B | 5agiA | 5bm nA |
| 4u8fB | 4v3lC | 4wutA  | 4xrmA  | 4yucA   | 4zotA | 5agrA | 5bmtA  |
| 4u98A | 4w5zA | 4wuvA  | 4xslA  | 4yudA   | 4zoxA | 5ah1A | 5bobA  |
| 4u9hL | 4w64A | 4wwfA  | 4xtbA  | 4yvoA   | 4zoxB | 5ahkA | 5bovA  |
| 4u9hS | 4w6yA | 4wwhB  | 4xtlA  | 4ywaA   | 4zoyA | 5aigA | 5bowA  |
| 4u9oA | 4w78C | 4wy4A  | 4xtvB  | 4ywkA   | 4zpcA | 5ailA | 5bp3A  |
| 4u9uA | 4w78H | 4wy4B  | 4xu wA | 4yx1A   | 4zqxA | 5aimA | 5bp9A  |
| 4ua6A | 4w79A | 4wy4C  | 4xxfA  | 4yycA   | 4zr8A | 5ajgA | 5bpkA  |
| 4ua8A | 4w7lA | 4wy4D  | 4xxlA  | 4yz0A   | 4zrxA | 5ajoA | 5br4A  |
| 4uabA | 4w7wA | 4wy9A  | 4xxxA  | 4yzgA   | 4zs9B | 5akrA | 5bs1A  |
| 4uasA | 4w88A | 4wydA  | 4xzfA  | 4yznA   | 4zurB | 5al6A | 5bsrA  |
| 4uavA | 4w8bA | 4wzxA  | 4y1bA  | 4y z rA | 4zv0A | 5an5J | 5bt9A  |
| 4udgD | 4w8hA | 4wzx E | 4y1wA  | 4yzzA   | 4zv0B | 5anpA | 5btwB  |
| 4udqA | 4w8pA | 4x00B  | 4y2fA  | 4z04A   | 4zv5A | 5ao9A | 5btyA  |

|       |       |       |       |       |       |       |       |
|-------|-------|-------|-------|-------|-------|-------|-------|
| 5bv8A | 5cvwA | 5e4gA | 5favB | 5gs7A | 5htlA | 5ix8A | 5js4A |
| 5bwiA | 5cwbA | 5e56A | 5fbfA | 5gsmB | 5htxA | 5ixbA | 5jscA |
| 5bxbB | 5cwgA | 5e5yA | 5fc1A | 5gt5A | 5hubA | 5ixgB | 5jskB |
| 5by5A | 5cwhA | 5e68B | 5fc9B | 5gtqA | 5hw3A | 5ixhA | 5jugA |
| 5by8A | 5cwlA | 5e75A | 5fd9A | 5gtuA | 5hwaA | 5iy2A | 5juhA |
| 5by8B | 5cxxA | 5e7hA | 5febA | 5gtuB | 5hwkA | 5iz3A | 5jviE |
| 5bykA | 5cyvA | 5e95B | 5fewA | 5gv0A | 5hwnA | 5izaA | 5jxmA |
| 5c04A | 5czwA | 5e9pA | 5ffdA | 5gv8A | 5hwoA | 5j1jA | 5k08A |
| 5c0pA | 5d1mB | 5ec6A | 5fffA | 5gvrA | 5hzdA | 5j1nA | 5k26A |
| 5c12A | 5d2kA | 5eckA | 5ffxA | 5gwnA | 5i0yA | 5j1sA | 5k2iA |
| 5c17A | 5d4nC | 5edfA | 5fh7A | 5gy7A | 5i1uB | 5j1sB | 5k2lA |
| 5c2uA | 5d4vA | 5eeqA | 5fi3A | 5gycA | 5i29A | 5j3tA | 5k2xA |
| 5c30A | 5d5yB | 5ehaA | 5fisA | 5gz3A | 5i2hB | 5j3tC | 5k34A |
| 5c33B | 5d66A | 5ehiA | 5fjdA | 5h0mA | 5i32A | 5j41A | 5k3xA |
| 5c3fB | 5d6eA | 5ej8A | 5fjlA | 5h0qA | 5i34A | 5j4fA | 5k4bA |
| 5c40A | 5d78A | 5el3A | 5flwA | 5h1nA | 5i39A | 5j4lA | 5k6dA |
| 5c4mA | 5d7uA | 5el9A | 5flyB | 5h28A | 5i45A | 5j4oA | 5k7aA |
| 5c5gA | 5d7wA | 5elbC | 5fmuA | 5h2dA | 5i5bA | 5j4uA | 5k87A |
| 5c5tA | 5d84A | 5em0A | 5focA | 5h3jA | 5i5mB | 5j6yA | 5k8jA |
| 5c5zA | 5d8vA | 5embA | 5fpzA | 5h3jB | 5i5nA | 5j90A | 5k8jB |
| 5c68A | 5daeA | 5emiA | 5fqaA | 5h3vA | 5i7iA | 5jajA | 5k8sA |
| 5c6sA | 5dagA | 5emxA | 5fqeA | 5h6tA | 5i86A | 5jazA | 5k91A |
| 5c79A | 5dblA | 5ep2A | 5frdA | 5h6xA | 5i8fA | 5jbnA | 5karA |
| 5c7hA | 5dclA | 5ep6A | 5fs8A | 5h7eA | 5i90A | 5jbxA | 5kb6A |
| 5c7qA | 5dcuA | 5ep6B | 5fsvA | 5h9iA | 5i95A | 5jc8A | 5kdiB |
| 5c8zA | 5de3A | 5epfA | 5ftbA | 5h9nA | 5iaiA | 5jcaL | 5kdsA |
| 5c98A | 5dfyA | 5epwA | 5fu5A | 5hb6A | 5ib9A | 5jcaS | 5kf9A |
| 5cd2A | 5dgjA | 5eq0A | 5fuiA | 5hb7A | 5ibqA | 5jdaA | 5kfzA |
| 5cdkA | 5dhda | 5eq7A | 5fukA | 5hbpA | 5icuA | 5jdda | 5khtA |
| 5cdvA | 5dicA | 5er6A | 5fv5A | 5hbsA | 5idbA | 5jdkA | 5ki9A |
| 5cecA | 5djhA | 5etrB | 5fvnD | 5hc0A | 5idhA | 5je2B | 5kkoA |
| 5cecB | 5dkaA | 5eu0B | 5fydA | 5hdiA | 5idqA | 5jelA | 5klaA |
| 5cegB | 5dkxA | 5ew0A | 5fypA | 5hdmB | 5idvA | 5jelB | 5kleA |
| 5cegC | 5dldA | 5ewoA | 5g1aA | 5heeA | 5ifzA | 5jgkA | 5knhI |
| 5cfjA | 5dleA | 5ewuA | 5g28A | 5hggB | 5ig6A | 5jgyA | 5ko4A |
| 5cg5A | 5dloA | 5ewyA | 5g2uA | 5hgwA | 5igiA | 5jh8A | 5ko5A |
| 5cgqA | 5dltA | 5ex2A | 5g2vA | 5hgza | 5ihfA | 5jhxA | 5ko9A |
| 5cgqB | 5dm2A | 5exhC | 5g38A | 5hhaA | 5ihwA | 5ji7A | 5kp7A |
| 5civA | 5dmaA | 5ey0B | 5g3yA | 5hheD | 5ii6A | 5jicA | 5kp7B |
| 5ciyA | 5dmdA | 5eyfA | 5g4iA | 5hhjA | 5ii8A | 5jigA | 5ktnA |
| 5cklA | 5dnlA | 5eynA | 5g51A | 5hj1A | 5ik4A | 5jj2A | 5kvbA |
| 5cl8A | 5dp2A | 5ezuA | 5g5cA | 5hj9A | 5imaA | 5jkjA | 5kvcB |
| 5cm7A | 5du9A | 5f2kA | 5ggba | 5hjfa | 5in1A | 5jlaA | 5kvrA |
| 5cmlA | 5dufA | 5f3mA | 5ggnA | 5hk3A | 5inbB | 5jlbA | 5kvsB |
| 5cofA | 5dviA | 5f47A | 5gi7A | 5hkoA | 5io9A | 5jmuA | 5kwmA |
| 5cowA | 5dwaB | 5f4cA | 5gizA | 5hl3A | 5ipyA | 5jntA | 5kxhA |
| 5coyA | 5dxlA | 5f5nA | 5gjiA | 5hmlA | 5iqnG | 5jo8A | 5kxhB |
| 5cozA | 5dxxA | 5f68A | 5gkmB | 5hmvA | 5ir4A | 5jodA | 5ky0B |
| 5cphA | 5dzeA | 5f6eA | 5gm9A | 5hoeA | 5isvA | 5jovA | 5ky4B |
| 5cr4A | 5dzoA | 5f6rA | 5gmdA | 5hpiA | 5it6A | 5jowA | 5ky5B |
| 5crwA | 5dzsA | 5f7vA | 5gnfA | 5hqhA | 5itmA | 5jp6A | 5kycB |
| 5ctaA | 5e1nA | 5f82A | 5ngnA | 5hqjA | 5itqA | 5jphA | 5kzzA |
| 5ctdC | 5e1wA | 5fa8A | 5gp7A | 5hraA | 5itwA | 5jqfA | 5l0nA |
| 5ctmA | 5e1yA | 5faaA | 5gqiA | 5hsfA | 5ivkA | 5jqnA | 5l0rB |
| 5ctvA | 5e37A | 5fafA | 5grqA | 5hsgA | 5iwhA | 5jrtA | 5l0vA |
| 5cuoA | 5e4bA | 5fagA | 5grqC | 5ht2A | 5iwuA | 5jryA | 5l0vB |

|       |       |       |       |       |       |       |       |
|-------|-------|-------|-------|-------|-------|-------|-------|
| 5l20A | 5m0nA | 5n4bA | 5o2xA | 5qivA | 5tw4B | 5uyjA | 5w8qA |
| 5l20B | 5m0wA | 5n4bC | 5o37A | 5qoqA | 5tw9A | 5uzgB | 5w98A |
| 5l2lA | 5m0yB | 5n4kA | 5o45A | 5qr1A | 5tz5A | 5uzmA | 5wa2A |
| 5l37C | 5m10A | 5n6fA | 5o58A | 5qs9A | 5tzmA | 5uzzA | 5wd9A |
| 5l4lA | 5m17A | 5n7qA | 5o5sA | 5qu8A | 5tzpA | 5v01A | 5wecA |
| 5l6uA | 5m1mA | 5n81A | 5o63A | 5r0dB | 5u00A | 5v0mA | 5wfbA |
| 5l74A | 5m1pA | 5n86A | 5o6hA | 5r4oA | 5u0iA | 5v0zC | 5wfyA |
| 5l77A | 5m29A | 5nakA | 5o6tA | 5r4qA | 5u1hA | 5v1vB | 5wgiA |
| 5l87A | 5m2oB | 5nb4A | 5o75A | 5r4vA | 5u23D | 5v1vD | 5wjpa |
| 5l9zA | 5m2pA | 5ncbA | 5o95A | 5r7xB | 5u2oA | 5v1yB | 5wk0A |
| 5l9zB | 5m33A | 5ncjA | 5o99B | 5r8qA | 5u3aA | 5v2oA | 5wkrA |
| 5lalB | 5m3qA | 5ncwA | 5o9mA | 5rjJA | 5u4hA | 5v3nA | 5wl1A |
| 5lauA | 5m4bA | 5ncwB | 5o9qA | 5rkzA | 5u4nA | 5v3nB | 5wljB |
| 5lb7A | 5m5zA | 5nfmA | 5oakA | 5rw1B | 5u4qA | 5v44A | 5wm2A |
| 5lb7B | 5m72A | 5nfqA | 5oazA | 5suiA | 5u4sA | 5v5hA | 5wmkA |
| 5lbdA | 5m72B | 5ng7A | 5obpA | 5sv2A | 5u5oA | 5v6fA | 5wn9A |
| 5ldgA | 5m7yA | 5nggA | 5obtE | 5sv5A | 5u5tC | 5v6jA | 5wouA |
| 5leoA | 5m97B | 5ngnA | 5obyA | 5svyA | 5u69A | 5v89A | 5wp4A |
| 5lfzA | 5maoA | 5nhuJ | 5od4A | 5swcE | 5u7aA | 5v8sA | 5wqjA |
| 5lhmA | 5mawD | 5ni9A | 5odkA | 5sy4B | 5u81A | 5vbdA | 5wriA |
| 5lhwA | 5mawE | 5ni9B | 5oduE | 5szcA | 5u8uA | 5vcmA | 5wsfA |
| 5lhxA | 5mbxA | 5nioA | 5oe3A | 5t1iA | 5uamA | 5vczA | 5wucA |
| 5li7A | 5mc7A | 5nj9A | 5of1A | 5t39A | 5ubaA | 5veiA | 5wwdA |
| 5ljlA | 5mduA | 5nj9B | 5ofkA | 5t3bA | 5ucsB | 5vf5A | 5wxhA |
| 5ljmA | 5mfaA | 5njiA | 5ohqA | 5t46B | 5udiA | 5vfaA | 5x2eA |
| 5ljpA | 5mfoA | 5njoA | 5oj5A | 5t5lA | 5ue1A | 5vfbA | 5x40A |
| 5ljxA | 5mgwA | 5nldB | 5oj7A | 5t7aA | 5uebA | 5vg0A | 5x4bA |
| 5lkbA | 5mh6A | 5nmnA | 5ojlA | 5t7dB | 5uejA | 5vg3B | 5x4rA |
| 5lndA | 5mjrA | 5nmxA | 5ok6A | 5t8cA | 5ufhA | 5vgbA | 5x57A |
| 5lnnA | 5mk9A | 5nnaA | 5okaA | 5t9cE | 5ufnA | 5vgbB | 5x5jA |
| 5lomA | 5ml3B | 5noaA | 5ol4A | 5ta0A | 5ufyA | 5vglA | 5x5mA |
| 5lp9A | 5mozA | 5nqoA | 5ol4B | 5tabA | 5ug9A | 5vhgA | 5x5vA |
| 5lpaA | 5mprA | 5nr4B | 5ol4C | 5tcbA | 5ugrA | 5vi6A | 5x7lA |
| 5lq5A | 5mpwA | 5nrhB | 5ol9A | 5tdaA | 5ujcA | 5vivA | 5x89A |
| 5lq6A | 5mr1A | 5nrmA | 5olla | 5tdrA | 5ul6A | 5vjtA | 5x9iA |
| 5ls4A | 5msaA | 5nrmB | 5olrC | 5tfqA | 5ulbA | 5vn4B | 5x9lA |
| 5ls7B | 5msoA | 5nsaA | 5omtA | 5tg0A | 5um2A | 5vnyA | 5xa5A |
| 5ls7D | 5mszA | 5nt7A | 5on8B | 5thkA | 5umfA | 5vogA | 5xa5B |
| 5lsvA | 5mteA | 5nt7B | 5onkA | 5tifA | 5umhA | 5vpsA | 5xavA |
| 5lt5A | 5mu9A | 5ntbA | 5opfA | 5tjzA | 5umpA | 5vrkA | 5xb0A |
| 5ltlA | 5muaB | 5nulA | 5opzA | 5tk2C | 5umrA | 5vscA | 5xbcA |
| 5lu5D | 5mujA | 5nuvA | 5oq3A | 5tkwA | 5umsA | 5vugA | 5xbiA |
| 5lunA | 5mulA | 5nvjA | 5otnA | 5tkzA | 5uouA | 5vx1B | 5xbuA |
| 5lusA | 5mwaA | 5nw3A | 5ouoA | 5tleA | 5uq6A | 5vxvA | 5xc5A |
| 5lvoA | 5mwzA | 5nwpA | 5ovkA | 5tnvA | 5uqsC | 5vyqA | 5xcoB |
| 5lw3A | 5mx9A | 5nx7A | 5ovoA | 5tnwB | 5uqzA | 5w0gA | 5xcqB |
| 5lwxA | 5my5A | 5nykA | 5ovvA | 5toqA | 5ut3A | 5w0hA | 5xdcA |
| 5lx6A | 5my7A | 5nzgA | 5oxzA | 5tpiA | 5uuiA | 5w2fA | 5xdhC |
| 5lxeA | 5mzwA | 5nzoB | 5oxzB | 5tqiA | 5uukA | 5w2iA | 5xecA |
| 5lxxA | 5mzWD | 5o0dA | 5oycA | 5tqjA | 5uukB | 5w3rA | 5xevA |
| 5lxzB | 5n0oA | 5o0sA | 5p9jA | 5trqA | 5uuOB | 5w4aC | 5xj5A |
| 5ly3A | 5n17A | 5o0uA | 5p9vA | 5tsqA | 5uwaB | 5w7wT | 5xk6A |
| 5ly8A | 5n1pA | 5o15A | 5q22A | 5tt5A | 5uwzA | 5w83A | 5xkaA |
| 5lypA | 5n3jA | 5o1lA | 5qhhA | 5tv2A | 5ux1A | 5w83B | 5xkrA |
| 5lzkA | 5n41A | 5o29A | 5qi0A | 5tvoA | 5uxmA | 5w8jA | 5xkxA |
| 5lznA | 5n48B | 5o2dA | 5qinA | 5tvoB | 5uxsA | 5w8oB | 5xluA |

|       |       |       |       |       |       |       |       |
|-------|-------|-------|-------|-------|-------|-------|-------|
| 5xluB | 5yseB | 6a27A | 6blkD | 6d0hB | 6efcA | 6fc0B | 6g44A |
| 5xm5B | 5ysiA | 6a56B | 6bm5A | 6d4kA | 6efnA | 6fc1B | 6g47A |
| 5xn9B | 5ysqA | 6a58A | 6bnzA | 6d4rA | 6egeA | 6fdgA | 6g49A |
| 5xneB | 5yt6F | 6a5dB | 6bo0A | 6d9nA | 6eh4D | 6fdkA | 6g4jA |
| 5xtuA | 5yufA | 6a71A | 6bqaA | 6d9yA | 6eh4E | 6fexA | 6g4jB |
| 5xveA | 5yugA | 6a7tB | 6bscA | 6dcdA | 6ehbA | 6ff1A | 6g5pA |
| 5xvjA | 5yuqA | 6a80B | 6bscB | 6dceA | 6ehiA | 6ff2A | 6g62A |
| 5xvtA | 5yvkA | 6a9sA | 6bsuA | 6dcjA | 6eimA | 6ffaA | 6g6kA |
| 5xw2A | 5yvnA | 6ac0A | 6bt1A | 6dcmA | 6eioA | 6fg8A | 6g6kD |
| 5xwxA | 5yvxA | 6ac5A | 6bumD | 6ddmC | 6ekgY | 6fg8B | 6g7nA |
| 5xz4A | 5ywrB | 6ae9A | 6bw9A | 6dfpA | 6eklB | 6fgcA | 6g85A |
| 5xz7A | 5yxA  | 6ag8C | 6bw9B | 6dg4A | 6ekzA | 6fggA | 6g8uA |
| 5y0mA | 5yxmA | 6aibA | 6bwlA | 6dgaA | 6elcA | 6fi2A | 6g8yA |
| 5y1fA | 5yzpA | 6ajpA | 6bxDA | 6dggA | 6elmA | 6fieB | 6g96A |
| 5y33A | 5z0dA | 6akkA | 6bxgA | 6dgmB | 6elvA | 6fihA | 6gajA |
| 5y46A | 5z0dB | 6am3X | 6bxrA | 6dhtA | 6eniA | 6fiyB | 6gbiA |
| 5y4mA | 5z0uA | 6amgB | 6c10A | 6dkqA | 6ensA | 6fj7A | 6gcfA |
| 5y4tA | 5z37A | 6anzA | 6c1xA | 6dnmA | 6eozA | 6fjnA | 6gcvA |
| 5y4zA | 5z3eA | 6ao9A | 6c1zA | 6dnoB | 6eqeA | 6fjvA | 6gd3A |
| 5y5qA | 5z42A | 6apeA | 6c29B | 6dopA | 6eqsA | 6fl1A | 6gdjA |
| 5y6yB | 5z48A | 6aqsA | 6c2cB | 6dqhA | 6er1A | 6flfA | 6gdxB |
| 5y90A | 5z51A | 6ar0A | 6c30B | 6dqpB | 6er4B | 6flkA | 6gehA |
| 5y9xA | 5z6bA | 6arhA | 6c3cA | 6ds9A | 6es9A | 6fm5A | 6geuA |
| 5y9zA | 5z6dA | 6at4B | 6c3mA | 6dt3A | 6et0A | 6fm7A | 6gg1A |
| 5ya6A | 5z99A | 6atrA | 6c4qA | 6dtsA | 6et0B | 6fmbA | 6gg7B |
| 5yalA | 5z9yA | 6atwA | 6c52D | 6dtvA | 6etlA | 6fmcA | 6gg7C |
| 5yayA | 5za3A | 6avxA | 6c5bA | 6dubA | 6eu8A | 6fmeB | 6ggpA |
| 5yayB | 5zb0A | 6b1kA | 6c74A | 6dvrA | 6euwA | 6fnuA | 6ghtA |
| 5ybyA | 5zbfA | 6b1zA | 6c8cB | 6dyfA | 6evgA | 6fohA | 6gi2A |
| 5yc6U | 5zbyA | 6b26A | 6c9xA | 6e0kA | 6evnA | 6fopA | 6gi4B |
| 5ycaC | 5zbzA | 6b2vA | 6cafA | 6e0oA | 6evuA | 6foqA | 6gitA |
| 5yceA | 5zcyA | 6b5kA | 6caxA | 6e1fB | 6ewhA | 6fpqA | 6gkeA |
| 5yddA | 5zdmA | 6b6uA | 6cb7A | 6e1xA | 6ewlA | 6fq1A | 6gkxA |
| 5ydeA | 5ze8A | 6b7pB | 6cbnA | 6e1zA | 6ewmA | 6freA | 6gmcA |
| 5ydnA | 5zhoA | 6b8fA | 6cbrA | 6e28C | 6exmA | 6fsgA | 6gmfA |
| 5yedA | 5zhzA | 6b9hA | 6cbuA | 6e3aA | 6exxA | 6fsnA | 6gmpA |
| 5ygbA | 5ziqA | 6b9hB | 6cd7A | 6e3iB | 6exzA | 6ft2A | 6gn5A |
| 5yh4A | 5zkeB | 6b9xA | 6cd9A | 6e4dA | 6ey1A | 6ftfB | 6gnaA |
| 5yhrA | 5zm0A | 6b9xB | 6cdxB | 6e4lA | 6eygA | 6fthA | 6gp3A |
| 5yiuA | 5zmuA | 6b9xC | 6chxA | 6e55D | 6eziA | 6ftoA | 6gpkA |
| 5yj6A | 5zo3A | 6b9xD | 6cj7A | 6e5fA | 6f0wS | 6ftoC | 6gpzB |
| 5ykjA | 5zqaA | 6b9xE | 6ckaB | 6e5xA | 6f43A | 6fu9A | 6gqcA |
| 5ykrA | 5zrcA | 6ba9A | 6ckmA | 6e5yA | 6f4jA | 6fu9B | 6gqdA |
| 5ykuA | 5zryA | 6bcbA | 6cngD | 6e60A | 6f4jC | 6fucA | 6gqzA |
| 5ykzA | 5zt3A | 6bcdA | 6cnwA | 6e68A | 6f5cA | 6fviA | 6greB |
| 5ylgA | 5zu6A | 6bcdB | 6cojA | 6e6oA | 6f5zA | 6fw0A | 6grlA |
| 5ynxB | 5zw7A | 6bd0A | 6cojB | 6e6qB | 6f5zC | 6fxaA | 6gszA |
| 5yobA | 5zwuA | 6bdnA | 6cpbB | 6e6uB | 6f6mA | 6fxdA | 6gugA |
| 5yofA | 5zx8A | 6bevA | 6cr0A | 6e7eA | 6f8aA | 6fyjA | 6gv5A |
| 5yqaA | 5zx9A | 6bg8B | 6ctzA | 6e85A | 6f8bA | 6fyrA | 6gv8A |
| 5yqjA | 5zzaP | 6bgdA | 6cumA | 6e94A | 6f8nA | 6fz6A | 6gvdA |
| 5yqwA | 6a02A | 6bgyA | 6cw0A | 6ectA | 6f8pA | 6g00A | 6gvkB |
| 5yrhA | 6a0aA | 6bhdA | 6cwmA | 6edmA | 6f9oA | 6g1cV | 6gx2A |
| 5yrvA | 6a0cA | 6bioA | 6cz4A | 6edvA | 6f9qA | 6g1iA | 6gy5A |
| 5yrvB | 6a0jA | 6bjbA | 6d0aA | 6ef6A | 6fbqA | 6g1pA | 6gz0A |
| 5yrvC | 6a1iA | 6bk0A | 6d0hA | 6ef7A | 6fc0A | 6g25A | 6gz8A |

|       |       |       |       |       |       |       |       |
|-------|-------|-------|-------|-------|-------|-------|-------|
| 6gzuA | 6hurA | 6j4pB | 6kc5B | 6lqfA | 6ne2A | 6ozdA | 6q5aA |
| 6gzwA | 6hx0A | 6j6pA | 6ketA | 6lqnA | 6nfrA | 6ozeA | 6q5oA |
| 6h0cA | 6hxmA | 6j6vA | 6kfaA | 6luhB | 6nhxA | 6p0cA | 6q61A |
| 6h0hB | 6hxpA | 6j93A | 6kfnA | 6lutB | 6nibA | 6p28A | 6q62A |
| 6h0mA | 6hy3A | 6j98A | 6kfsA | 6lxaA | 6nioA | 6p29B | 6q6rG |
| 6h10A | 6hyfA | 6jalA | 6kgcA | 6m0eA | 6nj1A | 6p2lA | 6q6tA |
| 6h17A | 6hyoA | 6jccA | 6kgcB | 6m1vA | 6njkA | 6p2nA | 6q78A |
| 6h1qA | 6hzgA | 6jchA | 6khlA | 6m3dC | 6nk0B | 6p3nA | 6q7dA |
| 6h20A | 6hzaA | 6jd9A | 6kiaB | 6m4qA | 6nkhD | 6p44B | 6q7iB |
| 6h24A | 6i03A | 6jebA | 6kiiA | 6m64A | 6nlqC | 6p58B | 6q7rA |
| 6h2rC | 6i05A | 6jh7A | 6kilA | 6m64F | 6nnrB | 6p5hB | 6q8eA |
| 6h2uA | 6i0iA | 6jiwA | 6kisA | 6m76A | 6np3A | 6p7zA | 6q9lA |
| 6h2uB | 6i18A | 6jttD | 6kjkA | 6m8nA | 6nq4B | 6p80A | 6qazA |
| 6h40A | 6i1aB | 6jk2A | 6kjaA | 6m9mA | 6nq6A | 6p8jB | 6qdiA |
| 6h4eA | 6i1mA | 6jk4A | 6klzA | 6m9zD | 6nq6D | 6pbmA | 6qe0A |
| 6h4lA | 6i3bA | 6jkrF | 6kmjA | 6maaA | 6nrhA | 6pcdD | 6qhgA |
| 6h5wA | 6i3qB | 6jkzA | 6kmoB | 6mb8A | 6nsvA | 6pckA | 6qhjA |
| 6h8gA | 6i4eA | 6jl3A | 6ko8A | 6mbbB | 6nvxA | 6pczA | 6qjaA |
| 6h8nA | 6i4eG | 6jleA | 6kp5B | 6mbfA | 6nvxB | 6pfxB | 6qjlA |
| 6h8oA | 6i5oD | 6jleE | 6kqsA | 6mdhA | 6nx0A | 6phiA | 6qlaB |
| 6h96A | 6i5rA | 6jm5B | 6kr5B | 6mdwA | 6nx5C | 6pjaA | 6qo9B |
| 6h99A | 6i65A | 6jmbA | 6krwA | 6mfuA | 6nyoA | 6pkfA | 6qp1A |
| 6h9uB | 6i6mA | 6jnjA | 6ksrA | 6mgcA | 6nytA | 6pkhA | 6qpkA |
| 6ha4A | 6i8yA | 6jnyB | 6kthA | 6mhaA | 6nzsA | 6pljA | 6qprA |
| 6harE | 6i9aA | 6jptA | 6ku0B | 6micA | 6o15B | 6pnvA | 6qpsA |
| 6havA | 6i9oC | 6jq8A | 6kv9A | 6mihA | 6o19A | 6pqkA | 6qspA |
| 6hazA | 6i9wA | 6jqbA | 6kwzA | 6mj7A | 6o2vA | 6pqkD | 6qspB |
| 6hbbA | 6ibeA | 6jqkC | 6kxtA | 6mm2A | 6o3pA | 6pt4B | 6qtsA |
| 6hc1B | 6icgA | 6jsaA | 6kzjA | 6mroA | 6o40A | 6pt8B | 6qvfd |
| 6hcwA | 6iewA | 6jtbA | 6kzjC | 6mrqI | 6o40B | 6puqA | 6qvsA |
| 6herA | 6if3A | 6ju1A | 6l0oA | 6mrrA | 6o4mA | 6puvA | 6qw0B |
| 6hfmA | 6ifbA | 6ju8B | 6l0qD | 6mrsA | 6o5iA | 6pvja | 6qxrA |
| 6hfqA | 6ifpA | 6jueL | 6l0vE | 6mu0A | 6o5kA | 6pwsA | 6qxuA |
| 6hg7A | 6iggA | 6jufB | 6l1pA | 6mw4A | 6o6jA | 6px0A | 6qz3A |
| 6hgmB | 6ih0A | 6jv0A | 6l27A | 6mwsA | 6o8lA | 6pxcA | 6r09A |
| 6hh2A | 6ihrA | 6jv7A | 6l4vA | 6mx3A | 6o9sA | 6pymA | 6r0rA |
| 6hheA | 6iipA | 6jvvA | 6l5hB | 6mydA | 6oalA | 6pz7A | 6r1dB |
| 6hhmA | 6iiyA | 6jwfA | 6l69B | 6myiD | 6od3F | 6pzdA | 6r1gB |
| 6hhnA | 6ij1A | 6jwjA | 6l7qA | 6n0dB | 6ofqA | 6pzlA | 6r1hA |
| 6hihA | 6ijeB | 6jwjC | 6l8gA | 6n0kA | 6ohkA | 6q00A | 6r2iB |
| 6hipB | 6imeB | 6jwmA | 6l8gB | 6n0xC | 6oj7A | 6q00B | 6r2wL |
| 6hiuB | 6inxA | 6jyzA | 6l8sA | 6n1bA | 6ojfB | 6q10A | 6r2wT |
| 6hk9B | 6iqcA | 6jz2A | 6l8xA | 6n36A | 6ojlA | 6q1hG | 6r33A |
| 6hl1A | 6iqxA | 6k0pA | 6lacA | 6n3dA | 6ojmA | 6q1mA | 6r3mA |
| 6hlyA | 6itaA | 6k1tA | 6lanA | 6n4lA | 6om5A | 6q2pB | 6r3wA |
| 6hn1A | 6itgA | 6k1wA | 6ld1A | 6n59A | 6on6A | 6q3pA | 6r4zA |
| 6hniA | 6iuxA | 6k2fB | 6ldlA | 6n6jA | 6oodA | 6q3pB | 6r5jC |
| 6hpaA | 6iwwB | 6k39A | 6lebB | 6n7aA | 6oriA | 6q3pC | 6r5tA |
| 6hpfA | 6ix1B | 6k4xA | 6lftB | 6n87A | 6os6A | 6q41A | 6r62A |
| 6hphA | 6ix2B | 6k5gD | 6lftA | 6n9bA | 6os7B | 6q41B | 6r7vA |
| 6hqcA | 6iy4I | 6k7cA | 6lg2B | 6n9hA | 6osxA | 6q43A | 6rb4A |
| 6hs0A | 6j0eB | 6k82B | 6lgiB | 6n9iA | 6ovmB | 6q43B | 6rb7F |
| 6hsaA | 6j33B | 6k93A | 6ljeB | 6n9mA | 6ovmR | 6q43C | 6rccX |
| 6hsdA | 6j4dA | 6k9jA | 6lk1A | 6nauA | 6owdA | 6q4gA | 6rg2B |
| 6hsjA | 6j4kB | 6kxbB | 6lkkA | 6nd7A | 6oxjB | 6q4rA | 6rhfA |
| 6htoA | 6j4pA | 6kc4E | 6ll8A | 6ndtB | 6oz7E | 6q4zB | 6ri6A |

|       |       |       |       |       |       |       |
|-------|-------|-------|-------|-------|-------|-------|
| 6rimH | 6sjaB | 6tgsA | 6uq8A | 6wcvB | 6y56A | 7bwhA |
| 6rivA | 6sldA | 6tguA | 6uqvA | 6wesA | 6y5uA | 7bysB |
| 6rjiA | 6sllB | 6thoA | 6uscB | 6wfiA | 6y74A | 7bzkA |
| 6rk0A | 6smtC | 6tj2B | 6ut9A | 6wfnA | 6y9jA | 7bzkB |
| 6rlxC | 6sooA | 6tj4A | 6utcA | 6wgmA | 6y9qB | 7c0dK |
| 6rlxD | 6sp9A | 6tjhA | 6uwaA | 6widA | 6ya6A | 7c1iA |
| 6rnvA | 6spoA | 6tjrA | 6uwpB | 6wm6A | 6ya6B | 7c1uA |
| 6rnzB | 6sqpB | 6tklI | 6uwwA | 6wmdA | 6ycbA | 7c31A |
| 6ro6F | 6sqxB | 6tl7B | 6uxeA | 6wmdB | 6ydrA | 7c38B |
| 6rppA | 6sreA | 6tm3A | 6uxeB | 6wmm  | 6yfiA | 7c5zA |
| 6rraA | 6srhA | 6tm9A | 6uxeD | A     | 6yiiA | 7c7dB |
| 6rrvA | 6srnA | 6tq5D | 6uy5B | 6wn5A | 6yipA | 7c82A |
| 6rs4B | 6srtA | 6tqtA | 6v04A | 6wn9B | 6yk4A | 7c8fA |
| 6ru1A | 6ssdA | 6tr4A | 6v1cA | 6wngB | 6yp6A | 7c8sA |
| 6rvqA | 6sshA | 6trjA | 6v2sA | 6wqyA | 6ypeA | 7cbdA |
| 6rvuA | 6st4A | 6trkB | 6v42B | 6wrtA | 6yskA | 7cboA |
| 6rw0A | 6stlB | 6ts4A | 6v4mA | 6wt8A | 6ywnA | 7cflC |
| 6rw7A | 6su3A | 6tt2B | 6v4wB | 6wupA | 6z1vA | 7cfwA |
| 6rwtA | 6su5A | 6ttnA | 6v67B | 6wxoA | 6z30A | 7ckjA |
| 6rxaA | 6sunA | 6tv2D | 6v71A | 6x1gA | 6z4aA | 7cn7A |
| 6rxkA | 6svlF | 6tveP | 6v7gA | 6x1nA | 6z4wA | 7cn7C |
| 6ry0A | 6swiA | 6twtB | 6vagB | 6x1xA | 6z96A | 7cncB |
| 6ry3A | 6swtB | 6tyjA | 6veaA | 6x42X | 6z9kA | 7d3dB |
| 6rygA | 6sxtA | 6tyuA | 6vg5B | 6x6zA | 6zcoA | 7fd1A |
| 6ryzB | 6sygA | 6tyyA | 6vgwA | 6x7nA | 6zeaA | 7jidA |
| 6rz0A | 6syiA | 6tzlD | 6vh6A | 6x84A | 6zegB | 7jjkA |
| 6s07A | 6syjB | 6tznA | 6vhuA | 6x8oA | 6zegC | 7jp2B |
| 6s0pA | 6syvA | 6tzxA | 6vigD | 6x94A | 6zjeA | 7k3tA |
| 6s1hA | 6t02B | 6u10A | 6vjjB | 6xb6A | 6zjsA | 7kb2A |
| 6s2mA | 6t0kA | 6u2sA | 6vjuA | 6xd8B | 6zlkC | 7kffA |
| 6s2rA | 6t0yA | 6u2uB | 6vk6A | 6xfjB | 6znvA | 7kpoA |
| 6s33A | 6t1uB | 6u43A | 6vk6B | 6xfuB | 6zpeA | 7kr0A |
| 6s5kA | 6t2tA | 6u4zA | 6vk6C | 6xhhB | 6zpkA | 7odcA |
| 6s5wB | 6t3xA | 6u54B | 6vo5B | 6xicA | 6zrnC | 8abpA |
| 6s6cA | 6t3zA | 6u66A | 6vo5D | 6xicB | 6ztxA |       |
| 6s6fB | 6t4xA | 6u97A | 6vo6C | 6xigA | 6zxtA |       |
| 6s8kB | 6t5jB | 6uaqA | 6vtbA | 6xipB | 6zzoC |       |
| 6s95B | 6t5kC | 6uawA | 6vtmE | 6xipC | 7a19B |       |
| 6s98B | 6t6eA | 6uaxA | 6vvnB | 6xjeD | 7a3hA |       |
| 6s9kB | 6t6hA | 6ub1D | 6vydA | 6xmiC | 7a3mA |       |
| 6sa5A | 6t6kA | 6ub6A | 6vz9A | 6xmyA | 7a5mA |       |
| 6saoA | 6t7oA | 6ubdA | 6vzaA | 6xokA | 7a77A |       |
| 6sbaA | 6t84A | 6ublB | 6vzxB | 6xpjC | 7abbA |       |
| 6sbaB | 6t9qA | 6uboA | 6w0vA | 6xrkB | 7adrA |       |
| 6sbfA | 6tabA | 6udvA | 6w0vB | 6xsoB | 7adrE |       |
| 6sbqA | 6tbiF | 6uf3A | 6w1gA | 6xvmB | 7adrF |       |
| 6scbB | 6tcbB | 6ufaA | 6w3dA | 6xweA | 7agmA |       |
| 6scfC | 6tccA | 6ufeA | 6w3wA | 6xxjA | 7akcA |       |
| 6scqA | 6tciA | 6ufvA | 6w46C | 6xy1C | 7akyA |       |
| 6sd8X | 6tcvB | 6uidA | 6w47B | 6xyaB | 7aniB |       |
| 6se1A | 6teqB | 6ujkB | 6w4lA | 6xybA | 7ao3B |       |
| 6shuA | 6tfrB | 6ukfX | 6w70A | 6xzuB | 7bqgA |       |
| 6sidA | 6tfxB | 6ulla | 6w90A | 6y1wB | 7bqiA |       |
| 6sigD | 6tg6A | 6uloA | 6w9oA | 6y1yB | 7bqpA |       |
| 6sj3A | 6tgjA | 6umuA | 6wayA | 6y43A | 7bu2B |       |
| 6sj8A | 6tgkC | 6uofA | 6wcdA | 6y4eA | 7bvtA |       |
