# Supplementary material for: Automated Protein Secondary Structure Assignment from Cα Positions Using Neural Networks
Source: MDPI journal article supplement (doi:10.3390/biom12060841), 2022-06-17
Supplement: s1 [file s1]

|       |       |       |       |       |       |       |       |
|-------|-------|-------|-------|-------|-------|-------|-------|
| 1a6jA | 1dgwX | 1fduA | 1i5gA | 1kpsD | 1n65A | 1pvtA | 1s20H |
| 1a97A | 1dhrA | 1fj7A | 1ia9A | 1kqgC | 1n7kA | 1pvyA | 1s3pA |
| 1ae3A | 1dinA | 1fmd2 | 1icfD | 1krtA | 1n9eD | 1pxzA | 1s4fC |
| 1ak0A | 1dm0A | 1fp0A | 1idjB | 1ks6A | 1namA | 1q0dA | 1s5aA |
| 1ak5A | 1dnuD | 1fp3A | 1if1A | 1ksia | 1narA | 1q3xA | 1s7jB |
| 1akpA | 1doiA | 1fs2A | 1ihnb | 1ksqA | 1nciB | 1q67A | 1sa8A |
| 1am2A | 1dp3A | 1ft9A | 1ii2B | 1ku5A | 1ne2A | 1q7lD | 1sddA |
| 1apyA | 1dq3A | 1fueA | 1iiuA | 1kutB | 1nhlA | 1q8rB | 1sfxB |
| 1arbA | 1dqnA | 1fviA | 1ijcA | 1kvqA | 1nlqE | 1qa7A | 1sh8B |
| 1ashA | 1dqxD | 1g3nC | 1im4A | 1kvuA | 1nm3B | 1qcxA | 1sisA |
| 1avgl | 1ds6B | 1g4uS | 1im8B | 1kwaA | 1nm6A | 1qe5C | 1smsA |
| 1aw5A | 1ds9A | 1g71B | 1ipeA | 1kywF | 1npyD | 1qfxA | 1sngA |
| 1b5fB | 1dw2B | 1g7oA | 1ipiB | 1l0oC | 1nt2A | 1qgeD | 1sp4A |
| 1b7dA | 1dwnA | 1g8jD | 1iquA | 1l0qD | 1ntxA | 1qgeE | 1spwA |
| 1b7gO | 1dxkA | 1gcuA | 1ir0A | 1l2mA | 1nviD | 1qjtA | 1squA |
| 1b8gA | 1dy2A | 1gdeB | 1irxB | 1l3oA | 1nvmF | 1qlwB | 1srvA |
| 1b8sA | 1e0bA | 1gh2A | 1ithB | 1l3pA | 1nzpA | 1qmyA | 1stoA |
| 1bdjB | 1e1hB | 1gheB | 1itpA | 1l5xB | 1o12B | 1qozB | 1suuA |
| 1be1A | 1e39A | 1ghrA | 1iu9A | 1l6hA | 1o7dB | 1qqhA | 1sv6E |
| 1bh2A | 1e5iA | 1gjiA | 1iv1A | 1l7aB | 1o99A | 1qrrA | 1svjA |
| 1bjnB | 1e5rB | 1gklA | 1iwmA | 1l8lA | 1o9hA | 1qrrA | 1svyA |
| 1bjwA | 1e68A | 1gl4B | 1iwpB | 1l9dB | 1o9zA | 1qs0A | 1sz3B |
| 1bmxA | 1earA | 1gmvB | 1ixlA | 1leaA | 1odsH | 1qsdB | 1szhB |
| 1bo4A | 1ebuD | 1gouA | 1iykA | 1ljjA | 1oe6B | 1qstA | 1sznA |
| 1bo9A | 1ee6A | 1gpqA | 1izcA | 1lk9A | 1ogyB | 1qv9C | 1szuA |
| 1boeA | 1ee9A | 1gqpA | 1j0aA | 1ln0B | 1oj1A | 1qvrA | 1t06A |
| 1bolA | 1egpA | 1grjA | 1j0tA | 1lnsA | 1ojzA | 1qwxB | 1t2wA |
| 1bplA | 1egpB | 1gsmA | 1j33A | 1lq9B | 1okgA | 1qx8A | 1t4mA |
| 1bu3A | 1ei3D | 1gugA | 1j3eA | 1lrkA | 1olpA | 1qydD | 1t57C |
| 1bw5A | 1ei3E | 1gxlD | 1j3pB | 1lrzA | 1omiB | 1r1dB | 1t62B |
| 1byfB | 1ei6D | 1gxsB | 1j6xA | 1luaC | 1oqjB | 1r1gA | 1t6pH |
| 1c25A | 1eifA | 1gyoB | 1jenB | 1lw5D | 1oqvC | 1r30B | 1t9fA |
| 1c2nA | 1eijA | 1gyyB | 1jfiA | 1m1jF | 1orgA | 1r4vA | 1td0A |
| 1c3oD | 1eizA | 1h0mA | 1jhgA | 1m32F | 1ou0A | 1r5xB | 1tggA |
| 1c3yA | 1ejxB | 1h3fB | 1jhnA | 1m33A | 1ou5B | 1r76A | 1tk1A |
| 1c5aA | 1ek5A | 1h4dA | 1jifB | 1m6uA | 1ox8B | 1r8oA | 1tk9D |
| 1c6vX | 1ekjA | 1h6lA | 1jk9B | 1m93A | 1oxzA | 1r9qA | 1tnbB |
| 1c93A | 1elqA | 1h6wA | 1jkzA | 1mc9A | 1oy5C | 1rdi1 | 1tolA |
| 1ccdA | 1emnA | 1h8uB | 1jmtA | 1mdaH | 1p42A | 1re0B | 1trlB |
| 1cl1A | 1eniA | 1hbkA | 1jmwA | 1mdaL | 1p4uA | 1ri6A | 1ts3A |
| 1cmxA | 1eomA | 1hfeS | 1jpxG | 1mhqB | 1p59A | 1rifA | 1tsjA |
| 1cokA | 1eoqA | 1hjdA | 1jroA | 1mjtB | 1p6sA | 1rjjB | 1tv4A |
| 1cpbA | 1ep1A | 1hkqA | 1jtdB | 1mmfA | 1p89A | 1rjlC | 1txjA |
| 1cq4B | 1eptA | 1hloA | 1jw3A | 1mmfM | 1p8cF | 1rkiB | 1tyjA |
| 1cqqA | 1ergA | 1hm0A | 1jxhB | 1mmoC | 1p91B | 1rmgA | 1tz0C |
| 1cr6B | 1ex9A | 1hmdA | 1k0kA | 1mmoG | 1pbiB | 1ro3A | 1u10F |
| 1csbA | 1eyvB | 1hpgA | 1k12A | 1mojD | 1pjrA | 1rq8A | 1u2fA |
| 1d1gB | 1ezgB | 1hpiA | 1k3gA | 1mqrA | 1pjzA | 1rrvB | 1u6mD |
| 1d1jA | 1f0iA | 1hpwA | 1k3kA | 1mt5P | 1pkvA | 1rsoC | 1u6tA |
| 1d1nA | 1f1cA | 1hqbA | 1k42A | 1mt6A | 1pmjX | 1ruwA | 1u83A |
| 1d1rA | 1f3yA | 1hqiA | 1k49A | 1mtlA | 1pn3A | 1rwrA | 1u9hA |
| 1d2iA | 1f46B | 1hsjA | 1k6dB | 1mwqA | 1pnfA | 1rybA | 1ue9A |
| 1d7rA | 1f56A | 1ht9A | 1k85A | 1mxfA | 1ps2A | 1rylB | 1uf3A |
| 1dbxB | 1f81A | 1huxB | 1kcyA | 1mzuA | 1ps9A | 1rz9A | 1ufmA |
| 1de2A | 1fbqB | 1hxmG | 1kfrA | 1n1fA | 1pujA | 1rzwA | 1ughI |
| 1de6D | 1fdnA | 1i4nA | 1kmzA | 1n4nA | 1puzA | 1s05A | 1ugvA |

|       |       |       |       |       |       |       |       |
|-------|-------|-------|-------|-------|-------|-------|-------|
| 1uh6A | 1wgeA | 1xvuA | 2a8eA | 2cdpD | 2dvkA | 2fgzA | 2h7zA |
| 1uhcA | 1wgwA | 1xvyA | 2a8fA | 2cdqA | 2dwkA | 2fh7A | 2h8aA |
| 1uhuA | 1wixA | 1y0eA | 2a8lA | 2ceoA | 2dwvA | 2firL | 2hb0B |
| 1uinA | 1wj5A | 1y10A | 2adlA | 2cg4A | 2dxbC | 2flfA | 2hb6A |
| 1ujvA | 1wj6A | 1y13C | 2aehA | 2cgqA | 2dxlB | 2fmmE | 2hbgA |
| 1um2A | 1wjnA | 1y1lD | 2afbA | 2cicA | 2dy8A | 2fmrA | 2hdwA |
| 1umgA | 1wjrA | 1y2xD | 2ahvA | 2cipA | 2dyqA | 2fmuA | 2he3A |
| 1umzA | 1wjwA | 1y47A | 2aj7B | 2ciqA | 2e11B | 2foiD | 2hevF |
| 1unnC | 1wk1A | 1y7nA | 2akfC | 2cjsA | 2e44A | 2fomA | 2hf6A |
| 1uocB | 1wkcA | 1ybfA | 2araA | 2ckiB | 2e61A | 2fprA | 2hf7A |
| 1usoB | 1wm4A | 1ychD | 2arkF | 2cm0A | 2e6oA | 2fqpA | 2hihB |
| 1uuzA | 1wn0D | 1yd6A | 2au3A | 2cmgA | 2e7iA | 2fqwA | 2hj9A |
| 1uwwA | 1wnhA | 1yhfA | 2avnA | 2cmpA | 2e7kA | 2ftuA | 2hjdA |
| 1uwyA | 1wp8C | 1yixB | 2axkA | 2cntD | 2ea6A | 2fv1B | 2hjsA |
| 1ux7A | 1wpnA | 1yk1B | 2b0lC | 2cofA | 2ea9A | 2fwtA | 2hmfA |
| 1uz5A | 1wq2B | 1yn3B | 2b1rA | 2couA | 2eanA | 2fwvA | 2hntE |
| 1v07A | 1wt6D | 1yn4A | 2b2yC | 2cq4A | 2ebdB | 2fx5A | 2hqrB |
| 1v2dA | 1wtuA | 1ynbA | 2b34H | 2cqva | 2ebjB | 2fytA | 2hrxA |
| 1v5lA | 1wvoA | 1ypxA | 2b42A | 2crbA | 2ebnA | 2fz5A | 2hryA |
| 1v5rA | 1wwlB | 1yr0A | 2b56A | 2cswA | 2ec3A | 2g04F | 2hszA |
| 1v6zA | 1wwtA | 1ys3A | 2b5dX | 2cu1A | 2ec6B | 2g0fA | 2ht1B |
| 1v72A | 1wx8A | 1ysjB | 2b61A | 2cu5A | 2ed4B | 2g29A | 2hu8A |
| 1v9zB | 1wz2B | 1ysmA | 2b6cA | 2cunB | 2ednA | 2g2dA | 2huoA |
| 1vc4A | 1wzzA | 1ysxA | 2b9dB | 2cwrA | 2edvA | 2g2xA | 2hvvA |
| 1vcyA | 1x19A | 1yt8A | 2basB | 2cwzD | 2ee1A | 2g3kA | 2hwtA |
| 1ve3B | 1x43A | 1yu3A | 2bb6A | 2cx6A | 2ee9A | 2g4oA | 2hx1A |
| 1vehA | 1x4xA | 1yubA | 2bcwC | 2czcA | 2eeeA | 2g7lA | 2hxdA |
| 1veuA | 1x5aA | 1yxbH | 2bfxC | 2czsB | 2eheA | 2g9eA | 2i0fE |
| 1vffA | 1x5pA | 1yxeA | 2bgwA | 2d05A | 2el5A | 2g9iA | 2i0kA |
| 1vg0A | 1x5yA | 1yxyA | 2bh1B | 2d16A | 2elaB | 2gasB | 2i0nA |
| 1vi7A | 1x86G | 1z06A | 2bh8B | 2d2mD | 2em3A | 2gauA | 2i25O |
| 1vj1A | 1x8dA | 1z0kD | 2bi0A | 2d68B | 2epmX | 2gbbD | 2i2wA |
| 1vjfA | 1x9iB | 1z1nX | 2bj1A | 2d7rA | 2eseA | 2gbsA | 2i3bA |
| 1vkwA | 1xa6A | 1z5fA | 2bkrA | 2d8iA | 2esvE | 2gbzA | 2i3eA |
| 1vl4B | 1xdyJ | 1z66A | 2bngC | 2d9vA | 2etta | 2ge5A | 2i3oC |
| 1vmdB | 1xewX | 1z6wA | 2bq4B | 2da0A | 2etvB | 2gtfB | 2i51B |
| 1vnhA | 1xf1B | 1z7nD | 2bswA | 2dc4A | 2evvA | 2gjnA | 2i5gB |
| 1vq2A | 1xfeA | 1z85A | 2btyC | 2dceA | 2ex5A | 2gk1S | 2i6tA |
| 1vqtA | 1xfjA | 1za4A | 2bugA | 2dcpA | 2exuA | 2gk1T | 2i6vA |
| 1vs1A | 1xg2B | 1zbmA | 2bv4B | 2ddfA | 2f1xB | 2gqfA | 2i7vA |
| 1vyhA | 1xg7B | 1zclA | 2bwbA | 2ddwB | 2f3lA | 2gqiA | 2ibbA |
| 1vzmC | 1xhoA | 1zglU | 2bwnA | 2dfjB | 2f3nA | 2grjA | 2ictA |
| 1w2tF | 1xhsA | 1zgxB | 2byoA | 2dfxI | 2f48A | 2gt4C | 2idgC |
| 1w30B | 1xi1B | 1zi7A | 2c1dB | 2dgwA | 2f4nA | 2gujB | 2if8B |
| 1w57A | 1xjtA | 1zk8A | 2c27A | 2dj2A | 2f5yA | 2gvsA | 2ifaA |
| 1w63L | 1xl8B | 1zm8A | 2c29F | 2djwJ | 2f6sA | 2gypA | 2ifgB |
| 1w6vA | 1xlrA | 1zmbF | 2c2iB | 2dk3A | 2f9cA | 2gz4D | 2ifrA |
| 1wc2A | 1xo1A | 1zn6A | 2c40B | 2dkxA | 2f9hB | 2h2uB | 2ifxB |
| 1wckA | 1xovA | 1zvcA | 2c45A | 2dlbB | 2f9iA | 2h31A | 2iiaA |
| 1wd2A | 1xppD | 1zvfA | 2c4fT | 2dnnA | 2fceA | 2h32A | 2ijcA |
| 1wdeA | 1xsqA | 1zylA | 2c4kF | 2dqaA | 2fenK | 2h39A | 2il4A |
| 1wewA | 1xsxB | 1zyqA | 2c9rA | 2dr1B | 2ffiA | 2h3gX | 2ilaA |
| 1wf1A | 1xt9A | 1zzmA | 2cakA | 2drhA | 2fg9A | 2h3kA | 2im9A |
| 1wfkA | 1xtzA | 2a05A | 2cb1A | 2dryA | 2fgeB | 2h5gA | 2imzA |
| 1wfsA | 1xv2D | 2a3dA | 2ccyA | 2du6B | 2fggA | 2h62D | 2inbA |
| 1wfxA | 1xvqA | 2a6xA | 2cdhZ | 2dvhA | 2fgrA | 2h63D | 2incC |

|       |       |       |       |       |       |       |       |
|-------|-------|-------|-------|-------|-------|-------|-------|
| 2inpC | 2khsB | 2lyjA | 2nzfA | 2pijB | 2r6iA | 2vriA | 2xc2A |
| 2inyA | 2khzB | 2lzxA | 2o14A | 2pk3B | 2r77A | 2vrnB | 2xdaA |
| 2itbB | 2kjbB | 2m05A | 2o2kB | 2plhA | 2r78D | 2vs0B | 2xdqA |
| 2iu1A | 2kknA | 2m19A | 2o4vC | 2plnA | 2rawB | 2vseB | 2xfoA |
| 2iusA | 2kl2A | 2m1bA | 2oaaB | 2plyB | 2rbdA | 2vsqA | 2xgnA |
| 2iwbB | 2koyA | 2m2aA | 2oajA | 2plzA | 2rdmC | 2vtfA | 2xgxA |
| 2ixlB | 2kp5A | 2m3fA | 2oasA | 2pmrA | 2rdnA | 2vu8I | 2xhfA |
| 2ixoA | 2kp8C | 2m3lA | 2ocaA | 2pnyA | 2re2B | 2vxaL | 2xhjA |
| 2ixvA | 2kqaA | 2m72A | 2ocxA | 2pofB | 2re3B | 2vywA | 2xj9A |
| 2j1kC | 2kqyA | 2m7pA | 2od2A | 2ppeC | 2rgkF | 2vz8A | 2xkhA |
| 2j48A | 2ks4A | 2m98A | 2odiB | 2pqgB | 2rh8A | 2vzbD | 2xm5A |
| 2j6zA | 2ksiA | 2m9kB | 2odkD | 2pr7B | 2ri9B | 2vzwA | 2xonL |
| 2j85B | 2ktmA | 2mahA | 2odlA | 2prdA | 2rjbD | 2vzyA | 2xp1A |
| 2j9pA | 2kuaA | 2mbgA | 2odxA | 2prvB | 2rpaA | 2w1tB | 2xqoA |
| 2ja3F | 2kuqA | 2mdvB | 2ofjA | 2pvdA | 2rppA | 2w2eA | 2xriA |
| 2ja9A | 2kw5A | 2mf4A | 2ogiA | 2pviB | 2rqeA | 2w2mE | 2xs6A |
| 2jadA | 2kw7A | 2mj9A | 2oh1D | 2pyqD | 2rr2A | 2w38A | 2xtlB |
| 2jatB | 2kwjA | 2mjpA | 2ohwB | 2pytB | 2rruA | 2w4lA | 2xtsD |
| 2jb3B | 2kxcA | 2mk4A | 2oiiA | 2q1dX | 2rspA | 2w54A | 2xxsA |
| 2jbrA | 2kxvA | 2mk5A | 2oikA | 2q1fB | 2rugA | 2w68A | 2xz8B |
| 2jftA | 2kzhA | 2mklC | 2olaA | 2q1wC | 2rukA | 2w6rA | 2y4oA |
| 2jgvA | 2l21A | 2ml2A | 2om6B | 2q2cC | 2sasA | 2w8dA | 2y9gA |
| 2jhnB | 2l57A | 2mlzB | 2oo3A | 2q33A | 2sqcB | 2w8xB | 2y9xH |
| 2jjxC | 2l60A | 2mm8A | 2opiA | 2q42B | 2u1aA | 2w95C | 2ybdA |
| 2jksA | 2l6zA | 2mn4A | 2oplB | 2q4xB | 2udpA | 2wacB | 2yc2A |
| 2jmuA | 2l73A | 2mnaA | 2oqgD | 2q52B | 2uydX | 2wanA | 2yewK |
| 2jmvA | 2l7mP | 2mpbA | 2or0B | 2q74C | 2uygL | 2wb3A | 2yg6A |
| 2jp2A | 2l7pA | 2mswA | 2oryB | 2q7dB | 2v0sA | 2wcmA | 2yg9A |
| 2jp7A | 2labA | 2mt8A | 2otjI | 2q9uA | 2v2fF | 2wcvA | 2yhnA |
| 2jqxA | 2lakA | 2mteA | 2ou2A | 2qa2A | 2v3qA | 2we0A | 2yijB |
| 2jtcA | 2lalD | 2mu0A | 2ouwB | 2qb6A | 2v5iA | 2weuD | 2yjkL |
| 2jujA | 2lb7A | 2mv4A | 2ov8A | 2qc9A | 2v6qA | 2wjiA | 2yjnB |
| 2jwsA | 2lbmA | 2mvgA | 2ovaA | 2qckA | 2v6vB | 2wk8A | 2ykoA |
| 2jwuA | 2lc2A | 2mw0A | 2owaB | 2qe6A | 2v73A | 2wknH | 2ylkA |
| 2jxmB | 2lepA | 2mwm  | 2owhA | 2qebA | 2vduB | 2wniA | 2ylwA |
| 2jz0A | 2lfhB | A     | 2ox1A | 2qffA | 2vdvF | 2wsiA | 2ymsB |
| 2jzjA | 2lfkA | 2mxzA | 2oxhE | 2qg6A | 2verA | 2wstA | 2ymsC |
| 2jzlA | 2ljpA | 2n1gA | 2oy9B | 2qgiA | 2vfvA | 2wt8D | 2ymuA |
| 2k0qA | 2lktA | 2n40A | 2oysB | 2qhtA | 2vgyA | 2wtoA | 2yn2A |
| 2k1pA | 2lkzA | 2n54B | 2oz0A | 2qiwB | 2vh3B | 2wukD | 2ynmC |
| 2k22A | 2lllA | 2n55A | 2p0hA | 2qjdB | 2vh9A | 2wuqA | 2yo0A |
| 2k2pA | 2lm9A | 2n87A | 2p0nB | 2qjxA | 2vjeB | 2wusS | 2yp1D |
| 2k3vA | 2lnkC | 2n8oA | 2p1zA | 2ql8B | 2vkgA | 2wvrB | 2ypdA |
| 2k4rA | 2lnzB | 2n8qA | 2p25A | 2qmmB | 2vkiA | 2wziB | 2ypjA |
| 2k5tA | 2lojA | 2nbtB | 2p4zA | 2qn5B | 2vkvA | 2wzlA | 2yq7B |
| 2k7lA | 2lozA | 2nc2A | 2p5dA | 2qneA | 2vmeF | 2x1jA | 2yqgA |
| 2k8hA | 2lq6A | 2nchA | 2p5lH | 2qnfB | 2vmiA | 2x28A | 2yrnA |
| 2k9xA | 2lq9A | 2nojB | 2p6yA | 2qqdC | 2vmnA | 2x2iB | 2yscA |
| 2kxbB | 2lroA | 2npnA | 2p73A | 2qryA | 2vn4A | 2x3bA | 2yt8A |
| 2kc7A | 2lruA | 2nq3A | 2p7nA | 2qsuB | 2vneB | 2x3hA | 2ythA |
| 2kcvA | 2ls6A | 2nrhB | 2pb0A | 2qu8A | 2vnkD | 2x5k0 | 2ytrA |
| 2kd0A | 2lstA | 2nujA | 2pblD | 2qv8A | 2vnrA | 2x6nA | 2yu2A |
| 2kdwA | 2lulA | 2nvmA | 2pcdE | 2qvtA | 2vo8A | 2x7pA | 2yv7A |
| 2kepA | 2lvqD | 2nvwA | 2pdoA | 2qxxB | 2vpsA | 2x9iD | 2yv9B |
| 2kgjA | 2lwaA | 2nw0A | 2pe4A | 2qzgD | 2vqaA | 2x9jB | 2yvhD |
| 2kgxB | 2lxmA | 2nxA  | 2pebB | 2r15A | 2vrcA | 2xadA | 2yvpA |

|       |       |       |       |       |       |       |       |
|-------|-------|-------|-------|-------|-------|-------|-------|
| 2yw8A | 3al6D | 3c5oA | 3dmyA | 3f8kA | 3godD | 3hzeA | 3k4zA |
| 2ywjA | 3al9B | 3c5zA | 3dnfA | 3faxA | 3gpkB | 3hzeA | 3k50A |
| 2ywoA | 3anoA | 3c65A | 3dnlA | 3fc3A | 3gr9H | 3i0uB | 3k7bB |
| 2yxdA | 3aqgB | 3c6mD | 3dohA | 3fddA | 3gs3A | 3i3uF | 3k7rC |
| 2yz1A | 3aw9A | 3c6vC | 3dplC | 3fdhA | 3gtzC | 3i3vC | 3k7tB |
| 2yzoB | 3axgO | 3c7oA | 3dtzE | 3ff0A | 3guzB | 3i6qA | 3k9aA |
| 2z00A | 3ay3D | 3c7tD | 3dwmB | 3ff5B | 3gv0A | 3i70A | 3kboA |
| 2z1tA | 3aygA | 3c8lA | 3dxiA | 3ff8D | 3gw4A | 3i7jA | 3kd9A |
| 2z2uA | 3azpA | 3c8vA | 3dxqA | 3fg2P | 3gw6A | 3i7tA | 3ke7A |
| 2z3pB | 3b0vC | 3c9hB | 3dzaD | 3fg9F | 3gw7A | 3i8dC | 3kesB |
| 2z4fA | 3b1bB | 3cawA | 3dztA | 3fgcA | 3gwqA | 3i9kA | 3kfvA |
| 2z4iA | 3b3cA | 3cbpA | 3dzuD | 3fgeA | 3gxA  | 3i9sA | 3ki0A |
| 2z59A | 3b48F | 3ce9D | 3dzvA | 3fgyB | 3gxrD | 3ia0A | 3kinD |
| 2z5eB | 3b49A | 3cf4A | 3e15A | 3fhbA | 3gyaA | 3ia1B | 3kkcD |
| 2z5ij | 3b4qB | 3cfsB | 3e1tA | 3fhgA | 3gypA | 3ic4A | 3kkdC |
| 2z5yA | 3b59F | 3cg1A | 3e2jA | 3fiiB | 3gytA | 3icpA | 3km5B |
| 2z6bA | 3b5mD | 3cjpB | 3e4wA | 3fj7A | 3gyxB | 3id9B | 3km9X |
| 2z6kB | 3b5nK | 3ckcB | 3e6zX | 3fkfA | 3gyxC | 3idfB | 3kmhB |
| 2z70A | 3b5pA | 3cmuA | 3e8oA | 3fljA | 3h13A | 3ie1D | 3kmvA |
| 2z8gA | 3b5tA | 3cooA | 3e8xA | 3fm3A | 3h1nA | 3ie2D | 3kpaC |
| 2z9zA | 3b6aF | 3coxA | 3e99A | 3fsdA | 3h1qB | 3igcA | 3krnB |
| 2za4B | 3b7fA | 3cpeA | 3e9uA | 3fveA | 3h1tA | 3ih5D | 3ks6D |
| 2zbaA | 3b8oA | 3cpxC | 3ebnA | 3fvwA | 3h2iA | 3ihwA | 3kt9A |
| 2zbmA | 3b9zA | 3cr8C | 3ec1A | 3fw6A | 3h2vH | 3iibA | 3ktbD |
| 2zc4E | 3ba3B | 3cspA | 3ecqA | 3fyaB | 3h4qA | 3iiuM | 3ktdD |
| 2zciD | 3bacA | 3csqD | 3ed3A | 3fz5D | 3h4wA | 3ilfA | 3ktoC |
| 2zdoA | 3balD | 3ctvA | 3edyA | 3fzgA | 3h6eA | 3ilhA | 3kw3A |
| 2zezA | 3be6D | 3cu2B | 3ee6B | 3g16B | 3h7jA | 3ilrA | 3kxiA |
| 2zgiD | 3bfwC | 3cuxA | 3eetB | 3g1cA | 3h7zA | 3io0A | 3l15A |
| 2zooA | 3bg4D | 3cvgD | 3ef0A | 3g1eB | 3h87B | 3ipjB | 3l1pA |
| 2zovA | 3bgtA | 3cwqA | 3efaA | 3g1oA | 3h8sA | 3irsC | 3l2hD |
| 2zozB | 3bhgA | 3cwvA | 3efeA | 3g23A | 3h96A | 3isuA | 3l2nA |
| 2zuyA | 3bhwB | 3cxpA | 3efyB | 3g7mA | 3hc2A | 3iu6A | 3l4bC |
| 2zwiA | 3bijC | 3cynC | 3efzA | 3g7pA | 3hd6A | 3iusB | 3l5aA |
| 2zwnA | 3bj6A | 3czxD | 3eglC | 3g7xB | 3heyA | 3iuwA | 3l6aA |
| 2zxiA | 3bksA | 3d3sD | 3ej3B | 3g8eB | 3hf7A | 3iwdD | 3l8dA |
| 2zzdJ | 3bmaA | 3d5pB | 3ek9A | 3g8wA | 3hfnB | 3iwtC | 3l9tA |
| 2zzeA | 3bmzB | 3d6nB | 3elgA | 3ga2A | 3hhdB | 3iz0C | 3la2A |
| 2zziB | 3bogB | 3d7jF | 3enkA | 3ga9S | 3hj9B | 3iz0D | 3ladB |
| 2zzkA | 3bpbB | 3d8kA | 3eo4A | 3gasF | 3hjqA | 3j31Q | 3latB |
| 3a0rA | 3bq3A | 3d8tB | 3eo6A | 3gb0A | 3hkmC | 3jcaC | 3lccA |
| 3a14A | 3brnB | 3danA | 3eo7A | 3gbrA | 3hlzB | 3jcmL | 3lefA |
| 3a23A | 3brsA | 3db0A | 3eoiB | 3gbvA | 3hm5A | 3jqxC | 3lfdD |
| 3a2bA | 3brwA | 3dc0A | 3epnB | 3gceA | 3ho5B | 3jrvB | 3lgaA |
| 3a2eD | 3btzA | 3dc7C | 3eqtB | 3gdmA | 3hpdA | 3jtwA | 3li6A |
| 3a4uB | 3bwnA | 3dciC | 3excX | 3gdtD | 3hqiB | 3ju0A | 3lihA |
| 3a4xB | 3bytA | 3dcpC | 3exfA | 3gewB | 3hqvA | 3jveA | 3ll9B |
| 3a54A | 3byvA | 3dddA | 3exiA | 3gffA | 3hqvB | 3jw8A | 3llvA |
| 3a76A | 3bzbB | 3dfiA | 3exmA | 3gfuD | 3hrdF | 3jwiB | 3lm2A |
| 3a9lB | 3c01H | 3dh0A | 3exzE | 3gg1B | 3hrdH | 3jxbD | 3lmcA |
| 3ab4O | 3c02A | 3dh8A | 3ey7A | 3gg6A | 3ht2C | 3jzzA | 3lmeL |
| 3ac9B | 3c0qA | 3di4A | 3eypA | 3ghdA | 3hvvA | 3k0zA | 3ln6A |
| 3agrA | 3c1dA | 3dlaD | 3f13B | 3gl5A | 3hx8A | 3k11A | 3ln7A |
| 3akaA | 3c1uA | 3dlwA | 3f2gA | 3gmgB | 3hxA  | 3k1jB | 3lnbA |
| 3akfA | 3c4mD | 3dm3C | 3f7eB | 3gmVX | 3hyqA | 3k20A | 3looC |
| 3akoB | 3c5hA | 3dmiA | 3f8hA | 3gmyB | 3hzbA | 3k25A | 3louA |

|       |       |       |       |       |       |       |       |
|-------|-------|-------|-------|-------|-------|-------|-------|
| 3lp9D | 3n71A | 3orcA | 3q7tB | 3rzvA | 3u22B | 3wn2A | 4ai5A |
| 3lpeB | 3n77A | 3orfA | 3q9cA | 3s0gB | 3u4gA | 3wobA | 4aitA |
| 3lsrA | 3n9lA | 3orjA | 3qayD | 3s0tA | 3u4yB | 3wqoA | 4ak1A |
| 3ltgD | 3na0D | 3os7A | 3qb8B | 3s2rB | 3u7vA | 3wqyB | 4akmA |
| 3lu2B | 3nadA | 3ougA | 3qbwA | 3s6dA | 3u7zB | 3wr2F | 4aktA |
| 3lvuD | 3ndhB | 3oumA | 3qc2A | 3s6oD | 3u9eA | 3wsbA | 4alfB |
| 3lw9B | 3neyA | 3ovkD | 3qcaD | 3s6sB | 3ua3A | 3wtrA | 4am9A |
| 3lx7A | 3njhA | 3ow2G | 3qfwB | 3s9fA | 3uatA | 3wucB | 4ao8A |
| 3lxxA | 3njxA | 3oweO | 3qh2D | 3sajD | 3ub0A | 3wv9D | 4asmB |
| 3lynA | 3nllA | 3owvA | 3qheA | 3sb3A | 3ue5B | 3wvcB | 4aupA |
| 3lyxB | 3nnmB | 3oy2A | 3qhpB | 3sdxC | 3ugkA | 3wy8A | 4av8A |
| 3lzaA | 3no4C | 3oyzA | 3qibD | 3sf5C | 3uk8B | 3x0fA | 4avaA |
| 3lzkD | 3no8A | 3ozbF | 3qiuC | 3shfA | 3ulyB | 3x0tB | 4ay8B |
| 3m05C | 3nokB | 3p04A | 3qmma | 3shvB | 3umvA | 3x2oA | 4azvA |
| 3m0nA | 3nt6A | 3p0cA | 3qocD | 3snxA | 3un9A | 3zbgb | 4azwA |
| 3m1gC | 3ntdB | 3p2uB | 3qp6A | 3solA | 3uotA | 3zcbB | 4azzA |
| 3m1uA | 3ntsB | 3p3vA | 3qphA | 3somA | 3upuA | 3zh0D | 4b0iA |
| 3m1yA | 3nu7A | 3p6yN | 3qqmA | 3sotF | 3upyA | 3zi1A | 4b1wM |
| 3m21F | 3nufB | 3p7jA | 3qr2A | 3sp1A | 3ustA | 3zj0A | 4b2zA |
| 3m5bA | 3nuqA | 3p8cE | 3qr8A | 3spsF | 3utoB | 3zk0A | 4b6uA |
| 3m6yD | 3nv0B | 3p96A | 3qrhA | 3sq3D | 3uunA | 3zk4C | 4b8bB |
| 3m7gA | 3nvlB | 3pamB | 3qrxB | 3st1A | 3v2gA | 3zm8A | 4b8nD |
| 3m9bA | 3nvtA | 3pesB | 3qryB | 3stqA | 3v7iA | 3zmnA | 4b96A |
| 3mb2A | 3nwjA | 3pf6D | 3qtgB | 3sxqB | 3v93A | 3zn6B | 4b9jA |
| 3mb8B | 3nybA | 3pftA | 3qvaA | 3sxyB | 3vadA | 3zpvY | 4bacB |
| 3mcoB | 3nysA | 3pgbA | 3qvoA | 3t12A | 3vcxB | 3zr6A | 4bbkA |
| 3mczB | 3nzeA | 3ph9B | 3qw4B | 3t38A | 3vezA | 3zt9A | 4bc5C |
| 3mdpA | 3nzqB | 3phzA | 3qy3A | 3t46A | 3vj7A | 3zueB | 4bduA |
| 3me8B | 3o5vA | 3pijB | 3qyqA | 3t4tB | 3vjzA | 3zusA | 4bg8A |
| 3mepC | 3o66B | 3pinB | 3r03A | 3t61B | 3vkdB | 3zv0B | 4bi9D |
| 3mezC | 3o6pA | 3pisA | 3r07A | 3t6oA | 3vnnA | 3zw5A | 4bitA |
| 3mhvA | 3o7kA | 3pivA | 3r0lA | 3t6rB | 3vocA | 3zxbD | 4bjhB |
| 3mipB | 3oa1B | 3pjeB | 3r0xA | 3tbjA | 3vpcD | 3zxqA | 4bk2A |
| 3mjkA | 3oa5A | 3pijA | 3r2xC | 3tbmA | 3vs8H | 3zxsC | 4bmKA |
| 3mjtB | 3oacC | 3pjlA | 3r5eA | 3tcjA | 3vs9E | 3zy6A | 4bmyA |
| 3mjvB | 3obeA | 3piyB | 3r6fA | 3td7A | 3vsvD | 3zymA | 4bn6A |
| 3mkyP | 3obkA | 3pkiA | 3r74A | 3tdmD | 3vtiC | 3zytA | 4bndB |
| 3mleA | 3ocdA | 3pm6B | 3r7wD | 3tdvA | 3vtnA | 3zzlC | 4bnqA |
| 3mmpC | 3od9A | 3pmdA | 3r89B | 3tf4A | 3vuoA | 4a0eB | 4bofH |
| 3mpxA | 3oeiC | 3pqiA | 3rbzA | 3tghA | 3vv1B | 4a1mA | 4bosB |
| 3mqmB | 3oetF | 3psjA | 3re2A | 3tm1A | 3vx8A | 4a1rD | 4bqlA |
| 3mruB | 3offA | 3psqB | 3renA | 3tm9A | 3vyiA | 4a2wB | 4bqoB |
| 3msrA | 3ofjA | 3pstA | 3rfiA | 3tmdA | 3vzqA | 4a47A | 4bt2A |
| 3mvcB | 3ogmP | 3pt3A | 3rfqC | 3to4D | 3w0rA | 4a5kA | 4bugB |
| 3mvnA | 3ogvA | 3pu5A | 3rfxC | 3tosJ | 3w1vB | 4a6aA | 4bvlD |
| 3mw3A | 3ogzA | 3pu6A | 3rfyA | 3trjD | 3w1yB | 4a8xC | 4bwhA |
| 3mx3B | 3ohaA | 3pv2D | 3rioA | 3tsnA | 3w9eC | 4a91A | 4bwoB |
| 3myfA | 3oj6D | 3pw9A | 3rj5A | 3tspA | 3waqA | 4aayB | 4bwpB |
| 3myuA | 3ol0A | 3pybC | 3rm5B | 3tssA | 3wb9A | 4ab7H | 4bwxB |
| 3myxB | 3ombA | 3pz1B | 3robd | 3ttgA | 3wdoA | 4abmA | 4bXlA |
| 3mz1D | 3omdB | 3q09T | 3rpeB | 3tuaA | 3wdyA | 4abtB | 4bz0A |
| 3n0aA | 3on1A | 3q1jA | 3rpfB | 3tyjA | 3we9A | 4ad9F | 4c1bC |
| 3n27C | 3onlB | 3q2sC | 3rpwA | 3tykA | 3wflA | 4adxl | 4c1rA |
| 3n2qA | 3onoA | 3q31A | 3rrwB | 3tyrA | 3wh9A | 4ae8D | 4c2dD |
| 3n3yD | 3op1C | 3q34A | 3ru8X | 3tzkB | 3wj7A | 4ag9B | 4c2eB |
| 3n6oA | 3optA | 3q4rA | 3ry0B | 3u0jB | 3wlaC | 4agvD | 4c2gA |

|       |       |       |       |       |       |        |       |
|-------|-------|-------|-------|-------|-------|--------|-------|
| 4c5nD | 4eijA | 4gjjD | 4im9C | 4lc9A | 4nknA | 4pmrA  | 4rbrB |
| 4ccyA | 4eivB | 4gkpA | 4in0B | 4le5B | 4nocA | 4pmyA  | 4rbwD |
| 4cdzA | 4ejzB | 4gmgA | 4ip6A | 4leeD | 4nohB | 4pnhL  | 4rg8A |
| 4ce7C | 4eoyA | 4gmjE | 4ipbB | 4lfnC | 4nqwA | 4pprA  | 4rjvD |
| 4cgeF | 4eozA | 4gn2A | 4ipvB | 4lgiA | 4nrhA | 4ppq1A | 4rkzB |
| 4cgxA | 4epqA | 4gp0A | 4itrB | 4liyA | 4nrnA | 4pu3A  | 4rmbB |
| 4chxB | 4eqaB | 4gp6A | 4ivnA | 4lj4A | 4ns5A | 4pu6A  | 4rn3B |
| 4ci3B | 4etqX | 4gpsA | 4iw7A | 4lm9A | 4ntgA | 4pvcA  | 4ro5A |
| 4ci6B | 4eueA | 4gq1A | 4ix1A | 4lmsC | 4ntlA | 4pzvA  | 4rpcB |
| 4cjcD | 4evmA | 4gr2A | 4ixsA | 4lowB | 4ntwB | 4q05B  | 4rrgD |
| 4cknD | 4evuB | 4grfA | 4iypC | 4lp7A | 4nv1C | 4q2jA  | 4rs2B |
| 4cktB | 4ewgA | 4guaA | 4izeA | 4ls3B | 4nvsA | 4q2wA  | 4rsjD |
| 4clvB | 4ewlB | 4gucB | 4j2cC | 4lsyB | 4nw4A | 4q3oA  | 4rt5B |
| 4cngB | 4exbF | 4gveA | 4j2pA | 4lv5A | 4nx8B | 4q56A  | 4ru4B |
| 4cooA | 4eywA | 4gwmB | 4j2sA | 4lv8A | 4o5sB | 4q5oB  | 4rv9A |
| 4cpgB | 4f03A | 4gyoB | 4j3qA | 4lw8A | 4o6gA | 4q5wB  | 4ryiA |
| 4cq4A | 4f0yB | 4gyrA | 4j41A | 4lwkB | 4o8uF | 4q69B  | 4rz0A |
| 4cu9A | 4f1iA | 4gz9A | 4j4sA | 4m01D | 4o9uB | 4q6qA  | 4rzhA |
| 4cxkB | 4f3rA | 4h0aA | 4j7pA | 4m1lB | 4oaeA | 4q6xA  | 4rzuB |
| 4cyjD | 4f4oC | 4h2dA | 4j8lA | 4m1xD | 4obbB | 4q82B  | 4s1mB |
| 4cz4A | 4f69A | 4h9kA | 4j8pA | 4m73B | 4obiA | 4qafB  | 4s2rP |
| 4czyC | 4f72B | 4hciB | 4jbeB | 4m8dL | 4ocoA | 4qakB  | 4s37A |
| 4d1fA | 4fb3E | 4hdkB | 4jd0A | 4mb8D | 4ofqA | 4qaqA  | 4s3nA |
| 4d3lA | 4fb9A | 4hedA | 4jenC | 4mctD | 4ohfD | 4qayA  | 4tkzF |
| 4d59A | 4fbmA | 4hesE | 4jgjB | 4mdoA | 4oi6B | 4qccB  | 4tlmD |
| 4d77A | 4fd7D | 4hfoA | 4jobA | 4me3A | 4oirA | 4qdkB  | 4tlxA |
| 4d7pA | 4fe9A | 4hfsB | 4jpdA | 4mgfB | 4ojvA | 4qeyJ  | 4tn5A |
| 4dayA | 4fetA | 4hg2B | 4jqsC | 4mixA | 4ok7C | 4qhjB  | 4tnmA |
| 4dddA | 4ffrA | 4hheA | 4js1A | 4mjsA | 4okqB | 4qhxA  | 4tqmA |
| 4dgfB | 4fgcA | 4hlyB | 4jupA | 4mkyA | 4onxF | 4qhzD  | 4tr5A |
| 4dghB | 4fgiH | 4hqlA | 4jxbA | 4mn0A | 4oogC | 4qkfc  | 4tt9D |
| 4dh2A | 4fioC | 4hr6B | 4k00A | 4mn7A | 4oouB | 4qkuA  | 4tvsA |
| 4di3D | 4fmaA | 4hrfA | 4k05B | 4mniA | 4opuA | 4qprA  | 4tweA |
| 4dl1A | 4fshA | 4hrGB | 4k28B | 4mnqD | 4oq1A | 4qqrB  | 4tyzB |
| 4dmgB | 4ftwA | 4hrwB | 4k2xB | 4mowD | 4orlA | 4qs9A  | 4u10B |
| 4dmuK | 4furA | 4htfB | 4k6bC | 4mr0A | 4owzB | 4qsfA  | 4u2eA |
| 4dooA | 4fyuC | 4htiA | 4k80A | 4msxA | 4oyuA | 4qtpD  | 4u3cF |
| 4dryA | 4fzxC | 4hu2A | 4ka4E | 4mtnA | 4p0yA | 4qtuC  | 4u3sB |
| 4ds2A | 4g0sB | 4huzA | 4kjmA | 4mwaA | 4p1bI | 4qtzA  | 4u49A |
| 4dwnB | 4g3aB | 4hvmA | 4kngE | 4mx2A | 4p1zD | 4qwoB  | 4u4eA |
| 4dzaA | 4g3tA | 4hx3A | 4knsA | 4mz0B | 4p2bA | 4qyzK  | 4u4jA |
| 4dzgA | 4g3vA | 4hx3L | 4kqdD | 4mzqL | 4p2cF | 4r04A  | 4u5hH |
| 4dzpB | 4g4fA | 4hy3D | 4ksmA | 4n0gC | 4p2qD | 4r0lC  | 4u6bA |
| 4e0qB | 4g4jA | 4hzpA | 4kzkA | 4n11A | 4p4nC | 4r0tB  | 4u6dB |
| 4e1lD | 4g76A | 4i0nA | 4l22A | 4n2rA | 4p5nB | 4r0zA  | 4u77A |
| 4e27A | 4g7wC | 4i0wC | 4l3fH | 4n4gA | 4p6vA | 4r1tA  | 4u7jA |
| 4e2gA | 4g8eA | 4i1dA | 4l4uA | 4n4hA | 4p94B | 4r27A  | 4uc4A |
| 4e61A | 4g9iE | 4i43A | 4l58A | 4n6bF | 4p9uE | 4r2fA  | 4ue5D |
| 4e89A | 4ga0A | 4i5lB | 4l5nF | 4n80A | 4pagA | 4r2mB  | 4ufcB |
| 4ea4A | 4ga5B | 4i69C | 4l5tA | 4n82B | 4pawA | 4r3vA  | 4ufqB |
| 4ecgA | 4gbmA | 4i6kA | 4l63B | 4n9xA | 4pc4A | 4r42A  | 4uhqB |
| 4edlD | 4ge0A | 4ibnA | 4l7vA | 4nfcA | 4pdtA | 4r72A  | 4ulwA |
| 4edpA | 4ge1A | 4icyA | 4l8fA | 4nfyB | 4ph8B | 4r7xA  | 4um5A |
| 4eeeB | 4gebB | 4ifeA | 4l8oA | 4ng0C | 4piwA | 4r81D  | 4umwA |
| 4ei9B | 4ggzD | 4iknA | 4l9aB | 4ni3A | 4pkxA | 4r8xD  | 4unmA |
| 4eibB | 4gigA | 4ilvA | 4lB7B | 4nk2B | 4pllB | 4r9iA  | 4unna |

|       |       |       |       |       |       |       |       |
|-------|-------|-------|-------|-------|-------|-------|-------|
| 4upgA | 4xpkA | 4zuyB | 5c2iA | 5eayA | 5h6oA | 5jp9B | 5lcnA |
| 4urjD | 4xq1A | 4zv4C | 5c2wF | 5ecfA | 5h8zA | 5jqfB | 5lefD |
| 4urpA | 4xqfA | 4zv9A | 5c4rA | 5ee2A | 5h9mB | 5jseA | 5lg4A |
| 4urrF | 4xqjA | 4zvdB | 5c9iD | 5efrA | 5hbqA | 5jtaA | 5lizA |
| 4ushA | 4xrrB | 5a29A | 5ccoA | 5eghB | 5hdlA | 5jtnF | 5ljoC |
| 4uurA | 4xsgB | 5a3kA | 5cd7F | 5eipB | 5hdpG | 5jtoE | 5llkA |
| 4uw0A | 4xsqB | 5a53A | 5cerA | 5ek8A | 5hk0D | 5jtgE | 5llxB |
| 4uwqA | 4xuvA | 5a60A | 5cftA | 5eovA | 5hm9A | 5jvvA | 5ln4A |
| 4uwqB | 4xwtA | 5a7mB | 5cgnE | 5epqA | 5hnmA | 5jw7B | 5ln5A |
| 4uy4A | 4xxhB | 5a7rA | 5chhA | 5eq4A | 5hp5A | 5jwcH | 5lo9B |
| 4uytA | 4xywA | 5a96A | 5cj9A | 5eqvA | 5ht6B | 5jwfA | 5lorA |
| 4uzkB | 4xzvC | 5a9cA | 5cjjB | 5esuD | 5hx0B | 5jwgB | 5lphA |
| 4v07A | 4xzvH | 5aa7B | 5cjpE | 5ewmD | 5hxbX | 5jxfD | 5lq7A |
| 4v0hD | 4y06B | 5abbZ | 5cnlB | 5exkK | 5hy4H | 5jysA | 5lrqA |
| 4v14A | 4y1eA | 5aеоA | 5cu1A | 5ey7A | 5i14B | 5jzgC | 5lu3A |
| 4v1rA | 4y1qA | 5ag8B | 5cupB | 5f5vD | 5i2cA | 5jzxF | 5lw8A |
| 4v2pA | 4y4nC | 5ah5B | 5cv1A | 5f67B | 5i33A | 5k0wB | 5lxuA |
| 4v33B | 4ycrA | 5ahuA | 5cwmA | 5f87F | 5i47B | 5k2mA | 5lxvA |
| 4v3dD | 4ycsA | 5aj2C | 5cx7P | 5f8cA | 5i5hA | 5k2mE | 5m1qA |
| 4w2rA | 4yeqU | 5aj9A | 5cx8A | 5fb1A | 5i5oB | 5k35A | 5m2sA |
| 4w66A | 4yg6D | 5ak8A | 5cxlB | 5fdkA | 5i62A | 5k5fA | 5m2sB |
| 4w78G | 4yhсA | 5aohB | 5cyjB | 5fldA | 5iebA | 5k5uA | 5m3iA |
| 4w7oA | 4ykaD | 5ap8C | 5czyA | 5fliA | 5if6F | 5k5vA | 5m88A |
| 4wcjA | 4ympC | 5avmA | 5d1lB | 5fmf1 | 5ihvA | 5k6dB | 5m8pA |
| 4wgkA | 4yn2A | 5avqA | 5d2iA | 5fmtA | 5ijoX | 5k6fF | 5manB |
| 4wh0H | 4ynhB | 5awfB | 5d5nB | 5fq6C | 5ijxA | 5k8gA | 5mehA |
| 4wiaA | 4yo1A | 5awqA | 5d5pD | 5fsbA | 5ikdA | 5k8kA | 5mg5X |
| 4wiwF | 4yrhB | 5axhA | 5d5zE | 5ftyA | 5ikyA | 5kбkA | 5mgуF |
| 4wj2A | 4yryA | 5azcA | 5d7bB | 5fu4B | 5il5B | 5kbmA | 5mh2A |
| 4wj1B | 4yteA | 5azxA | 5ddtA | 5fukB | 5im6A | 5kc2B | 5mh4A |
| 4wkWB | 4ywaD | 5b0pA | 5detB | 5fuxB | 5imkA | 5kc9C | 5mj7B |
| 4wliA | 4yxfB | 5b0vA | 5dgrB | 5fwsA | 5ipuB | 5kcнA | 5mk5D |
| 4wmoA | 4yxzA | 5b37F | 5dhmC | 5fxpB | 5it0A | 5kf1A | 5mlfF |
| 4wneB | 4yypB | 5b4pC | 5diyA | 5fydB | 5it3A | 5kh6A | 5mpvD |
| 4wopA | 4yzoA | 5b5uB | 5dj5B | 5fyoA | 5itmF | 5khuI | 5mr6G |
| 4wqsC | 4z02A | 5b5xA | 5djкA | 5g0fA | 5ityC | 5kiyB | 5mtcA |
| 4wsгA | 4z45A | 5bjwB | 5dl8A | 5g52C | 5ixuA | 5klfA | 5muiA |
| 4wtsA | 4z48A | 5bkmA | 5dljF | 5g56A | 5izwA | 5kniA | 5mv0D |
| 4wx3A | 4z4mA | 5bobE | 5dlyA | 5g5hB | 5j0cB | 5kp8B | 5mv9B |
| 4wx7C | 4z7rA | 5bp7C | 5dmpA | 5ggfA | 5j1dA | 5kshB | 5mz2I |
| 4wy2A | 4z80A | 5bp8A | 5dmrA | 5gqhC | 5j1tA | 5kuaA | 5n35A |
| 4x0gD | 4z85A | 5bptA | 5dniA | 5graB | 5j4fB | 5kuhA | 5n4kB |
| 4x28C | 4z9nA | 5btwA | 5drkA | 5groB | 5j4mC | 5kuyI | 5n6mA |
| 4x2xA | 4za3B | 5bu1A | 5dwcA | 5gt5B | 5j60A | 5l0pA | 5nb1F |
| 4x36A | 4za6B | 5bu2A | 5dwzG | 5gteA | 5j7cD | 5l16A | 5ncsA |
| 4xa9a | 4zciA | 5butA | 5dx5B | 5gx6A | 5jbtY | 5l2eC | 5ngnC |
| 4xc8A | 4zdeC | 5buvA | 5dy9A | 5gz8A | 5jcdC | 5l2lF | 5nh2B |
| 4xc9A | 4zhtD | 5bxfA | 5dzgA | 5h0iB | 5jd9A | 5l33A | 5nl1A |
| 4xchA | 4zjmA | 5bxxA | 5e4eA | 5h1nB | 5jdoB | 5l37E | 5nm8B |
| 4xcmB | 4zkdA | 5bxyB | 5e4mB | 5h3dD | 5jfzA | 5l6mA | 5nmzD |
| 4xf5B | 4zm6B | 5by2A | 5e50B | 5h40B | 5jg7B | 5l7vB | 5nnlB |
| 4xg0A | 4znbB | 5byoA | 5e59A | 5h45B | 5jg8A | 5l81A | 5ntbB |
| 4xhfA | 4znyA | 5bz4M | 5e5bA | 5h4bA | 5jh5A | 5l8jB | 5nw4h |
| 4xi1C | 4zosD | 5c00D | 5e5yD | 5h4uC | 5ji5A | 5l9sA | 5nx3D |
| 4xj6A | 4zq8A | 5c0oH | 5e6tA | 5h5oB | 5jk4A | 5la4A | 5o0xA |
| 4xjcA | 4zquB | 5c1iD | 5e8bA | 5h67A | 5jmfA | 5lalA | 5o1mB |

|       |       |       |       |       |       |       |       |
|-------|-------|-------|-------|-------|-------|-------|-------|
| 5o4hA | 5twaB | 5vnzD | 5xvlA | 5z75D | 6avyA | 6d6vH | 6f9fl |
| 5o5oD | 5txtF | 5vo5A | 5xvsB | 5z7gA | 6b2eA | 6d7aA | 6fbzB |
| 5o63B | 5u25A | 5volA | 5xxaB | 5z7iA | 6b2eB | 6d7kF | 6fc2D |
| 5o9yA | 5u2pA | 5vqjA | 5xyiU | 5z96D | 6b2xA | 6danA | 6fc5A |
| 5o9zz | 5u4qB | 5vrdD | 5xzkA | 5zauB | 6b8dA | 6daoB | 6fcxA |
| 5oa9A | 5u56B | 5vtsA | 5y18B | 5zbtA | 6bdjU | 6dbiD | 6fejA |
| 5ocrD | 5u5iB | 5vttA | 5y28A | 5zdeC | 6bevB | 6dftI | 6ff70 |
| 5odjA | 5u75A | 5vxyA | 5y2vA | 5zecA | 6bitH | 6dg3L | 6fhpA |
| 5odqG | 5u7nA | 5vyeA | 5y39F | 5zedA | 6bk5A | 6dj8A | 6fjuA |
| 5oenA | 5u9nB | 5w0aB | 5y4cA | 5zewA | 6bm7C | 6dkuA | 6fljA |
| 5of2A | 5u9zB | 5w1nD | 5y4kA | 5ziqD | 6bmcA | 6dmqA | 6fn6A |
| 5ofyA | 5ua4A | 5w3gA | 5y6lA | 5zizA | 6bp8A | 6dnuB | 6fnzD |
| 5ofzD | 5uasA | 5w4aD | 5y6lB | 5zjbA | 6bphA | 6do3A | 6fpcD |
| 5ogxA | 5ub7B | 5w5mB | 5y6oI | 5zjkA | 6bprA | 6dqoA | 6fprB |
| 5oj3A | 5ublA | 5w6lB | 5y7dA | 5zjlA | 6brmH | 6dr3A | 6fq0B |
| 5ojyA | 5ucgA | 5w7kA | 5y9hC | 5zkhB | 6bs5A | 6drmA | 6fskA |
| 5okuA | 5uddH | 5wa3A | 5y9yA | 5zl6A | 6bswB | 6drqA | 6fv3D |
| 5ol0A | 5ue2A | 5watB | 5yb8D | 5zmpA | 6btmA | 6dt1E | 6fw4A |
| 5ol8D | 5ue6I | 5wdxA | 5yc4A | 5zokD | 6bvVB | 6dx5A | 6fwsB |
| 5oljA | 5ufmA | 5wecB | 5yc9B | 5zolA | 6bwcF | 6dy2C | 6fxaB |
| 5olqA | 5ufvA | 5weeD | 5ydcA | 5zq5C | 6bxtC | 6dzkY | 6g13A |
| 5oltA | 5ug7A | 5wgvA | 5ydfA | 5zqvH | 6bzxA | 6e0lA | 6g1nA |
| 5oluA | 5ugzB | 5whkA | 5ydgA | 5zruC | 6c0dA | 6e0mA | 6g1oA |
| 5onuA | 5uidD | 5widC | 5ygrA | 5ztpA | 6c29A | 6e14D | 6g39A |
| 5oo8A | 5uk5B | 5wkhI | 5yk3B | 5zw9A | 6c2vA | 6e1qA | 6g3aA |
| 5oq2A | 5um7B | 5wlkD | 5yk5C | 5zz7B | 6c4mC | 6e33A | 6g45C |
| 5ovjA | 5umqA | 5wlnN | 5yk5D | 5zzbA | 6c4uB | 6e4qA | 6g4hA |
| 5ovnA | 5uohA | 5wo3B | 5ynrA | 5zzzA | 6c8sB | 6e5uA | 6g4wq |
| 5ow0B | 5upbD | 5wp5B | 5yp7D | 6a55A | 6camA | 6e6aA | 6g6lG |
| 5ow2B | 5ux5C | 5wtfB | 5yqqA | 6a56A | 6canB | 6e6sB | 6g70B |
| 5oxwD | 5uxbB | 5wufA | 5yr0A | 6a5bA | 6cb1A | 6ebyB | 6g8rB |
| 5oxxB | 5uxhA | 5wx1A | 5yriB | 6a5eD | 6cb6A | 6ec3C | 6g8wA |
| 5suhA | 5uz9K | 5wxkB | 5ysqB | 6a6cA | 6cblH | 6edxA | 6gaoC |
| 5t17A | 5v0fA | 5wyaA | 5ytiA | 6a6gD | 6choD | 6efwA | 6gcvc |
| 5t1jB | 5v0lA | 5x14A | 5yufD | 6a6oA | 6cd2B | 6eg0B | 6gdxC |
| 5t1pH | 5v1aB | 5x3hB | 5ywzA | 6a6yB | 6cgoA | 6ehcB | 6gemA |
| 5t2fA | 5v1uA | 5x4aA | 5yxiA | 6a83A | 6ch3B | 6ejfP | 6ggkB |
| 5t3pC | 5v1xH | 5x56A | 5yy2A | 6a8wA | 6chsA | 6ejvB | 6ghrE |
| 5t3wA | 5v36B | 5x8zA | 5yzmC | 6a8xB | 6chsH | 6ekmB | 6ghsA |
| 5t4xA | 5v47B | 5xaqB | 5z0zA | 6a93A | 6cj6A | 6el3A | 6giqf |
| 5t6oA | 5v4aB | 5xc2B | 5z25A | 6aa9A | 6ck0A | 6emkC | 6gmaA |
| 5t88A | 5v5qA | 5xdia | 5z28A | 6ab6C | 6ckqA | 6enkA | 6gp5A |
| 5tckA | 5v6bA | 5xe2A | 5z2xA | 6af4H | 6cnoD | 6epfW | 6gpaB |
| 5teaF | 5v6iA | 5xf7A | 5z34A | 6agma | 6cnuA | 6erpF | 6gpmA |
| 5tfoB | 5v8cA | 5xfhA | 5z3cA | 6ahuC | 6conB | 6et8B | 6gq4A |
| 5tfzA | 5v8sB | 5xfmA | 5z43A | 6aiiA | 6cpjA | 6et9I | 6gqeA |
| 5tizA | 5va2A | 5xg5A | 5z4gA | 6ajqA | 6cptA | 6eu6A | 6gqfD |
| 5tooA | 5vapB | 5xgpA | 5z4tB | 6akjA | 6cqNE | 6euaC | 6gqnB |
| 5towB | 5vbbA | 5xkoA | 5z51B | 6aklA | 6crdH | 6euiA | 6gtaA |
| 5tprA | 5ve9A | 5xm3B | 5z62D | 6am0A | 6cunA | 6ewgA | 6guiB |
| 5tpvA | 5vebY | 5xoiA | 5z62I | 6apjB | 6cuqC | 6ewpA | 6gw6A |
| 5tpwA | 5vhfd | 5xr2H | 5z62L | 6apnA | 6cvqA | 6exfD | 6gybS |
| 5tqmA | 5viaA | 5xr3H | 5z62M | 6aq3A | 6cw9D | 6exuA | 6gzcC |
| 5ts4D | 5vj7B | 5xtkA | 5z6eA | 6asdC | 6cyzA | 6ezmX | 6h0jA |
| 5tsyA | 5vl3Q | 5xumA | 5z6pB | 6au1B | 6czmF | 6f2rQ | 6h1qB |
| 5tvmF | 5vlxA | 5xuoA | 5z70A | 6avgB | 6d2zA | 6f74D | 6h1xA |



|        |       |       |       |       |       |       |       |
|--------|-------|-------|-------|-------|-------|-------|-------|
| 6h2bC  | 6j6aB | 6kupA | 6mltA | 6otvB | 6r46A | 6tdwB | 6v6nA |
| 6h3jB  | 6j7cA | 6kvxA | 6mlyA | 6ovkR | 6r4lA | 6tedX | 6v7nB |
| 6h4dA  | 6j7nA | 6kw6A | 6mmxD | 6owdB | 6r5kA | 6tejA | 6vbnA |
| 6h5hA  | 6j7xA | 6kxdB | 6mn5F | 6owrA | 6r5kH | 6tfoC | 6vcdA |
| 6h5lB  | 6j8oB | 6kxfA | 6molA | 6owtA | 6r5kN | 6tg2A | 6vdeA |
| 6h60A  | 6j9cD | 6kxsA | 6mpaB | 6oxmB | 6r5kO | 6tgtA | 6ve1A |
| 6h9eB  | 6jbjB | 6kxuH | 6mr1A | 6p18P | 6r5mA | 6thmE | 6vfsE |
| 6ha7D  | 6jcnB | 6kyuB | 6mr3C | 6p2aF | 6r60A | 6thtA | 6vggD |
| 6hbeC  | 6jd2D | 6l0uB | 6mtqT | 6p3qB | 6r7hF | 6tj2A | 6vgvA |
| 6hceA  | 6jdkA | 6l0vG | 6mw8A | 6p74A | 6r8iA | 6tj5B | 6vjaC |
| 6hciA  | 6jhpD | 6l1eA | 6my0A | 6p8uA | 6r9vA | 6tjiB | 6vjiA |
| 6hf1A  | 6jk7A | 6l1rA | 6mzoA | 6pa7N | 6rc9A | 6tjlB | 6vjpB |
| 6hftA  | 6jkuD | 6l2uB | 6n7rC | 6palA | 6rfuB | 6tk0X | 6vjrC |
| 6hhbD  | 6jl0A | 6l42A | 6n7xC | 6pbcA | 6rj0A | 6tn6A | 6vkzA |
| 6hjmA  | 6jm5A | 6l5hA | 6n9qP | 6pbzA | 6rjkA | 6tp5A | 6vp8B |
| 6hosA  | 6jmgA | 6l6jA | 6nagB | 6pkuD | 6rlaA | 6tpiA | 6vptA |
| 6hqjA  | 6jmtF | 6l7mA | 6nb4C | 6psfA | 6rmnB | 6tpqA | 6vq5A |
| 6hqvB  | 6jq1B | 6l7oI | 6nbgF | 6ptkD | 6rreF | 6tqhA | 6vs4B |
| 6hs7e  | 6jqdA | 6l86A | 6nbrD | 6puaA | 6rs2B | 6trmA | 6vshC |
| 6htoB  | 6jqzA | 6l8eA | 6ndxB | 6pwjA | 6rs9A | 6ts8A | 6vsjA |
| 6htvA  | 6js9A | 6l9sA | 6njnA | 6px6D | 6rtqB | 6tutR | 6vt5A |
| 6hvgA  | 6jt6A | 6lb9A | 6nkiA | 6q01D | 6rxsA | 6tv6A | 6vxkB |
| 6hw1B  | 6jtuA | 6lcnF | 6nluB | 6q09A | 6s1aB | 6tv9H | 6vxwA |
| 6hx9A  | 6jucA | 6leeA | 6no4B | 6q22B | 6s1kB | 6tylC | 6vy0D |
| 6hzfB  | 6jz1A | 6lfsA | 6nobA | 6q41C | 6s1zA | 6tzwB | 6w32C |
| 6i0aA  | 6k0aG | 6lhnA | 6nowA | 6q4wB | 6s4cA | 6u05A | 6w3oA |
| 6i0xB  | 6k0iA | 6lk4A | 6nppB | 6q5sA | 6s5eA | 6u2pA | 6w66B |
| 6i1qA  | 6k1eB | 6ll8B | 6nq4A | 6q63B | 6s5jA | 6u3vC | 6w9rL |
| 6i2nD  | 6k1fB | 6lp4A | 6nqiA | 6q8xX | 6s7qH | 6u51B | 6weo2 |
| 6i2vA  | 6k1yA | 6lpaA | 6nryA | 6qaiA | 6s7tH | 6u83A | 6wf4A |
| 6i2zB  | 6k2fA | 6lqeA | 6nsrM | 6qajA | 6s9rA | 6u8yl | 6wfqC |
| 6i50A  | 6k4jA | 6lqgA | 6nt9A | 6qayA | 6s9uA | 6u8yN | 6wg9A |
| 6i56E  | 6k4yM | 6lrhA | 6nu7A | 6qciD | 6sc9A | 6uadA | 6wgyA |
| 6i57A  | 6k5gA | 6lvnD | 6nx5D | 6qdlA | 6sdfa | 6uanB | 6wigA |
| 6i5bB  | 6k7fA | 6lw3A | 6ny0A | 6qe3A | 6sduD | 6ubbD | 6wjaB |
| 6i97A  | 6k95C | 6lw4A | 6ny5B | 6qe6A | 6sjiA | 6uekA | 6wjbB |
| 6iaaC  | 6k9nD | 6lxdB | 6ny9B | 6qekB | 6sjoB | 6ug5K | 6wjgD |
| 6ic4I  | 6ka3D | 6lxwS | 6nyrA | 6qfoA | 6skaD | 6uh4D | 6wpuA |
| 6iciA  | 6kacP | 6m13b | 6nzdG | 6qg0I | 6sqgA | 6uh5L | 6wqbA |
| 6ierA  | 6kacQ | 6m2aA | 6o2uA | 6qgtG | 6sslB | 6uj5B | 6wqiB |
| 6iheB  | 6kd6D | 6m2hB | 6o3eA | 6qh4D | 6steC | 6ukeX | 6wqpB |
| 6i iwA | 6keaD | 6m4lA | 6o6bD | 6qigA | 6suaB | 6unfB | 6wqxD |
| 6ijeA  | 6kgfA | 6m7zA | 6o6lA | 6qilD | 6sv3A | 6ur0A | 6wt6A |
| 6ilxA  | 6kgfB | 6m8mA | 6o7cA | 6qj6E | 6svkA | 6urfA | 6wt9A |
| 6iqsD  | 6kgjA | 6m8tA | 6ocgB | 6qkxA | 6sxjA | 6ut6A | 6wtiB |
| 6ir8A  | 6ki3B | 6m9cA | 6oddB | 6qp4A | 6sy9A | 6utsA | 6wueB |
| 6islB  | 6ki9A | 6m9yA | 6oewB | 6qpjA | 6t0vC | 6uv7B | 6wvsA |
| 6iuqB  | 6kmaB | 6mapB | 6ohlA | 6qpkB | 6t1dF | 6uv8A | 6wwdA |
| 6ivdB  | 6kmfA | 6mc8B | 6oitB | 6qveW | 6t3iA | 6uwtH | 6wxvA |
| 6ixhO  | 6kodA | 6mf4A | 6onnB | 6qwlQ | 6t70A | 6ux2A | 6x0aa |
| 6iy6E  | 6koeG | 6mfvA | 6onpA | 6qwoA | 6t7eA | 6uxgC | 6x0aA |
| 6j0eA  | 6kp1B | 6mgdA | 6opff | 6qzuA | 6tadA | 6uxuB | 6x1oB |
| 6j1iA  | 6kqcA | 6mgnA | 6opla | 6r17C | 6taqB | 6v4oW | 6x6oA |
| 6j2uA  | 6kr6A | 6mi5X | 6ormC | 6r1bD | 6tb2E | 6v4xH | 6x8nA |
| 6j38A  | 6krjA | 6mj8B | 6os3A | 6r1gA | 6td6B | 6v55A | 6x91H |
| 6j3aA  | 6ksyA | 6mlmA | 6otdA | 6r2hA | 6td7A | 6v67A | 6xb5A |

|       |       |       |       |       |       |       |
|-------|-------|-------|-------|-------|-------|-------|
| 6xfkA | 6zy0C | 7cxA  | 7ep2B | 7l0jA | 7o3iA | 7sh3B |
| 6xh9A | 6zymB | 7ckaA | 7ep9G | 7l1fD | 7o78A | 7shgA |
| 6xi9B | 6zzqA | 7cleA | 7epqB | 7l4aA | 7o79A | 7sj9N |
| 6xjhC | 7a17C | 7cljA | 7epuB | 7l5mB | 7o9mM | 7sp5A |
| 6xkbE | 7a4pC | 7cm1B | 7essA | 7l6wA | 7obqz | 7sr2B |
| 6xkwp | 7abh7 | 7cneA | 7eu34 | 7l78B | 7ociC | 7stdC |
| 6xmiF | 7adyF | 7co1F | 7evrC | 7ljtB | 7od2A | 7sv6A |
| 6xnsA | 7afuA | 7cogD | 7exkF | 7lkjA | 7odtA | 7sybA |
| 6xssA | 7aglA | 7cp6A | 7f21B | 7lpoC | 7ofqr | 7t2yB |
| 6xt4A | 7ahhD | 7cpxA | 7f2yA | 7lr1A | 7ogtB | 7t30B |
| 6xy1A | 7amvW | 7cqsA | 7f5iA | 7ltsA | 7oi6z | 7t3bE |
| 6xycA | 7aoaD | 7csjB | 7f6pA | 7lv8D | 7okxM | 7t4rA |
| 6xydD | 7aseA | 7csqB | 7f6tA | 7lvtD | 7okyZ | 7t71A |
| 6xz6D | 7auuA | 7ctqA | 7f6uA | 7lxcA | 7om8Y | 7t8wD |
| 6y110 | 7awvA | 7cueH | 7f6xB | 7ly7B | 7omcD | 7tacA |
| 6y3zA | 7axzB | 7cuzD | 7f7qA | 7m0iF | 7oqhF | 7tbsA |
| 6y45A | 7b1gD | 7cw1B | 7f8aA | 7m6uD | 7osbC | 7tfmA |
| 6y4fA | 7b1sB | 7cwhB | 7fdeP | 7m7fA | 7oskB | 7thhA |
| 6y4rA | 7b2cD | 7cwqA | 7fevA | 7mbnD | 7ot8B | 7tlx1 |
| 6y6kA | 7b2cF | 7cx1C | 7ffpA | 7mcdD | 7oxgB | 7tmvB |
| 6y87D | 7b2oA | 7cxvB | 7fisD | 7misC | 7oywA | 7trwA |
| 6yagD | 7b2sA | 7czhB | 7jhiA | 7mpyA | 7p0lA | 7txmA |
| 6yahB | 7b2xA | 7d1iA | 7jicA | 7mqSH | 7p3bB | 7ughB |
| 6yczC | 7b5lT | 7d5cA | 7jizA | 7mqyA | 7p9qF | 7v6dA |
| 6ygaA | 7b7hA | 7d6mB | 7jj9A | 7mskA | 7pagA | 7v6iA |
| 6yifC | 7bczD | 7d89A | 7jluB | 7mwCA | 7pc6H | 7vdvA |
| 6yj1A | 7bfyA | 7d9iA | 7jrjK | 7mwrB | 7pknM | 7vgmA |
| 6yleA | 7bjcB | 7dbwC | 7jrpg | 7mwzD | 7ppcL | 7vi7B |
| 6ymyk | 7bkbJ | 7dc4B | 7jt5A | 7myvA | 7pq8A | 7vw1A |
| 6yp4A | 7bobC | 7dl0B | 7jthH | 7n09A | 7prRB | 7w2vA |
| 6yq4C | 7bqlB | 7dl1C | 7jtkJ | 7n1nA | 7q1bA | 7w5vA |
| 6ys3z | 7br1A | 7dl3A | 7jtgC | 7n7iC | 7q3lq | 7wkkj |
| 6ysnA | 7bv6C | 7dnmA | 7k0qA | 7n7sF | 7q5bD | 7x0dA |
| 6yv7B | 7bv6V | 7dnpA | 7k0zC | 7n8oQ | 7q6zB | 7xayA |
| 6yy6A | 7bvzA | 7dpaD | 7k34D | 7nb0A | 7qbkA |       |
| 6z05L | 7bwn0 | 7dskA | 7k3pB | 7ncyA | 7qilA |       |
| 6z06A | 7bwyC | 7dveA | 7k5cD | 7nczA | 7qroA |       |
| 6z0oF | 7byyD | 7e0lA | 7k67A | 7nd0C | 7qs4D |       |
| 6z1hA | 7c03A | 7e2iG | 7k7jA | 7nekA | 7qs5B |       |
| 6z2iA | 7c13C | 7e2rB | 7kb2B | 7nh7B | 7r65A |       |
| 6z31B | 7c1eA | 7e36A | 7kflB | 7nJnN | 7r6oA |       |
| 6z82A | 7c1iF | 7e37A | 7kfuB | 7nljB | 7r76A |       |
| 6z9lA | 7c3vA | 7e4lB | 7kfuD | 7nmmA | 7r7bA |       |
| 6z9uA | 7c5zB | 7e4mA | 7kjaA | 7nmqA | 7rdrA |       |
| 6zb8B | 7c6oA | 7e62C | 7kn1A | 7nmsA | 7reaA |       |
| 6zc1A | 7c7dA | 7e9dA | 7kpzA | 7nn6A | 7reiA |       |
| 6zej0 | 7c7sA | 7ebkA | 7ks3C | 7np8A | 7rg7A |       |
| 6zfcF | 7c7uA | 7ecqA | 7ksbA | 7npaP | 7rg8A |       |
| 6zi8A | 7c8fB | 7eeiA | 7ksnA | 7nq4B | 7ri3D |       |
| 6zmlL | 7c8gB | 7eevA | 7ksoF | 7ntgA | 7rpqB |       |
| 6zplC | 7caqA | 7eftA | 7kw6A | 7nuuB | 7rrmC |       |
| 6zsoA | 7cdvB | 7eg5B | 7kwsA | 7nwFA | 7rztC |       |
| 6zv9B | 7cfeA | 7eg7c | 7kwtB | 7nyrG | 7s63D |       |
| 6zw9A | 7chuA | 7eg9B | 7kxyB | 7o2gA | 7scfA |       |
| 6zxwG | 7cigA | 7el1A | 7l00D | 7o37k | 7sciA |       |
| 6zxwH | 7cj9A | 7ennK | 7l0iA | 7o3el | 7seuA |       |
