# Supplementary material for: Automated Protein Secondary Structure Assignment from Cα Positions Using Neural Networks
Source: MDPI journal article supplement (doi:10.3390/biom12060841), 2022-06-17
Supplement: s1 [file s1]

# Hydrogen bonds potential

A hydrogen bond, which is a non-local (in the sense of sequence separation) potential is necessary to render proper packing of  $\beta$  strands in a sheet. We present a hydrogen bond potential devised to assess the geometry of  $\beta$  strands in proteins based only on  $C\alpha$  positions. The interaction involves two centers  $i$  and  $j$ , each of them with three subsequent  $\alpha$  carbons:  $i-1, i, i+1$  and  $j-1, j, j+1$ , respectively. Spatial arrangements of these atoms may be seen as two triangles, referred further as triangle  $i$  and triangle  $j$ . The general idea of the potential is to (a) properly arrange the two triangles  $i$  and  $j$  in space, and (b) to ensure each triangle interacts with at most two other triangles and only one on each side.

To detect an H-bond between  $i$ -th and  $j$ -th atoms, we use local coordinates systems (LCS) built on the central atoms of each triangle, i.e. three consecutive  $C\alpha$  atoms centred on  $i$ -th and  $j$ -th atoms, respectively. Formulas to calculate an LCS are given below:

$$\begin{aligned}\vec{v}_x &= \vec{v}_{1,2} + \vec{v}_{2,3} \\ \vec{v}_y &= \vec{v}_z \times \vec{v}_x \\ \vec{v}_z &= \vec{v}_{1,2} - \vec{v}_{2,3}\end{aligned}$$

where  $\vec{v}_{l,m} = |\vec{C}\alpha_m - \vec{C}\alpha_l|$  is a versor pointing from  $l$ -th to  $m$ -th  $C\alpha$  atom. In the next step, we calculate local coordinates of  $C\alpha_i$  in the LCS of triangle- $j$  and *vice versa*.

Statistics of these local  $x, y, z$  coordinates computed from a representative subset of PDB structures (PISCES). Analysis show that it is reasonable to change the cartesian coordinates  $y$  and  $z$  to radial  $r$  and angle. So instead of  $x, y, z$  we will use  $x, r$  and  $\alpha$  (i.e. the angle). After analysis of the statistics we decided to approximate each variable by a normal distribution. Parameters of these distributions were estimated with truncated robust estimator: 10% of extreme values were removed from estimating  $\mu$  and  $\sigma$  parameters of each Gaussian function. All these analyses and estimations were computed with BioShell package.

According to our definition, a CG hydrogen bond can be detected if all the six variables:  $x_i, r_i, \alpha_i, x_j, r_j$  and  $\alpha_j$  (three local coordinates of  $i$ -th  $C\alpha$  defined in the LCS of  $j$ -th triangle and three local coordinates of  $C\alpha_j$  defined in the LCS of triangle  $i$ , respectively) are in the allowed range established as described above. The final energy value is defined as:

$$E(x_i, r_i, \alpha_i, x_j, r_j, \alpha_j) = [f(x_i; \mu_x, \sigma_x) * f(r_i; \mu_r, \sigma_r) * f(\alpha_i; \mu_\alpha, \sigma_\alpha) * f(x_j; \mu_x, \sigma_x) * f(r_j; \mu_r, \sigma_r) * f(\alpha_j; \mu_\alpha, \sigma_\alpha)]^{1/6} \quad (S1)$$

The parameters for the equation:

|                      | Antiparallel |          | Parallel |          |
|----------------------|--------------|----------|----------|----------|
|                      | $\mu$        | $\sigma$ | $\mu$    | $\sigma$ |
| $x, \alpha > 5$      | -0,512       | 0,300    | 0,078    | 0,241    |
| $r, \alpha > 5$      | 4,748        | 0,174    | 4,796    | 0,146    |
| $\alpha, \alpha > 5$ | 6,524        | 0,216    | 6,429    | 0,160    |
| $x, \alpha < 5$      | -0,715       | 0,304    | -0,075   | 0,300    |
| $r, \alpha < 5$      | 4,812        | 0,128    | 4,792    | 0,164    |
| $\alpha, \alpha < 5$ | 3,375        | 0,243    | 3,272    | 0,175    |

The above equation is just a geometric average of fitness of each internal coordinate to the respective distribution observed in experimental structures. The sigmoid  $f()$  function is applied to make the energy function derivable. The energy value is symmetric: when atom  $C\alpha_i$  is H-bonded to  $C\alpha_j$ , at the same time  $C\alpha_j$  interacts with  $C\alpha_i$ . The detailed algorithm to calculate a HB between  $i$ -th and  $j$ -th  $C\alpha$  atoms is as follows:

- calculation of distances in every pairs (i-1, j-1) (i, j) and (i+1, j+1) for parallel and (i-1, j+1)(i, j) and (i+1, j-1) for antiparallel - this distances allows to distinguish the type of a sheet; all these distances must be in the range of  $4.0 \leq d \leq 6.2$
- calculation of LCS at  $C\alpha_i$  and  $C\alpha_j$  according to formulas above
- evaluation the energy value according to the formula (S1) with parameters from the table above
